# Supplementary material for: Analysis of metabolites in young and mature Docynia delavayi (Franch.) Schneid leaves using UPLC-ESI-MS/MS
Source: PeerJ journal article supplement (doi:10.7717/peerj.12844), 2022-02-04
Supplement: Fig._S2.pdf [file Fig._S2.pdf]

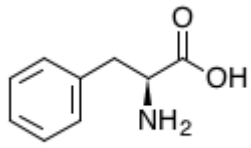

C00079

A: L-Phenylalanine

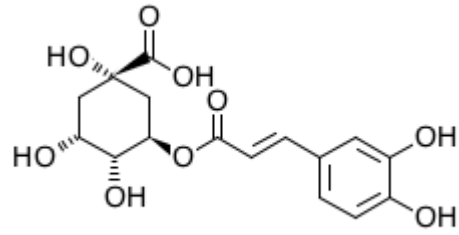

C00852

B: Chlorogenic acid

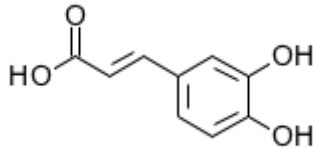

C01197

C: Caffeic acid

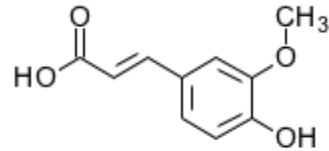

C01494

D: Ferulic acid

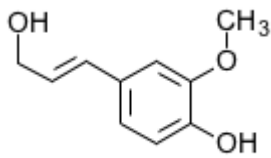

C00590

E: Coniferol

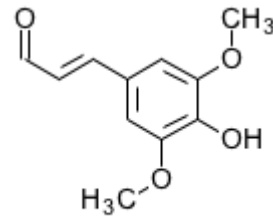

C05610

F: Sinapaldehyde

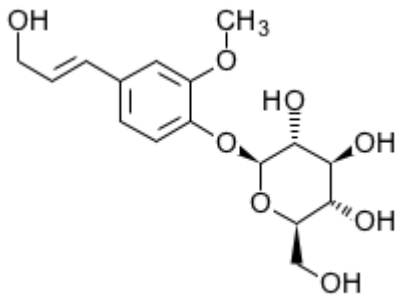

C00761

G: Coniferin

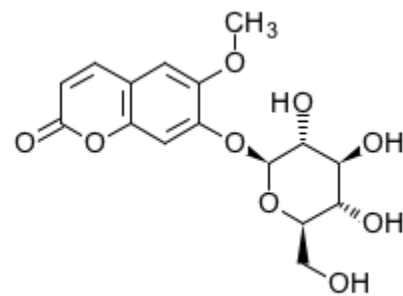

C01527

H: Scopolin

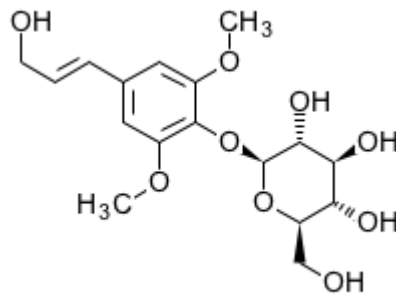

C01533

I: Syringin
