# Supplementary material for: Analysis of metabolites in young and mature Docynia delavayi (Franch.) Schneid leaves using UPLC-ESI-MS/MS
Source: PeerJ journal article supplement (doi:10.7717/peerj.12844), 2022-02-04

# PHENYLPROPANOID BIOSYNTHESIS

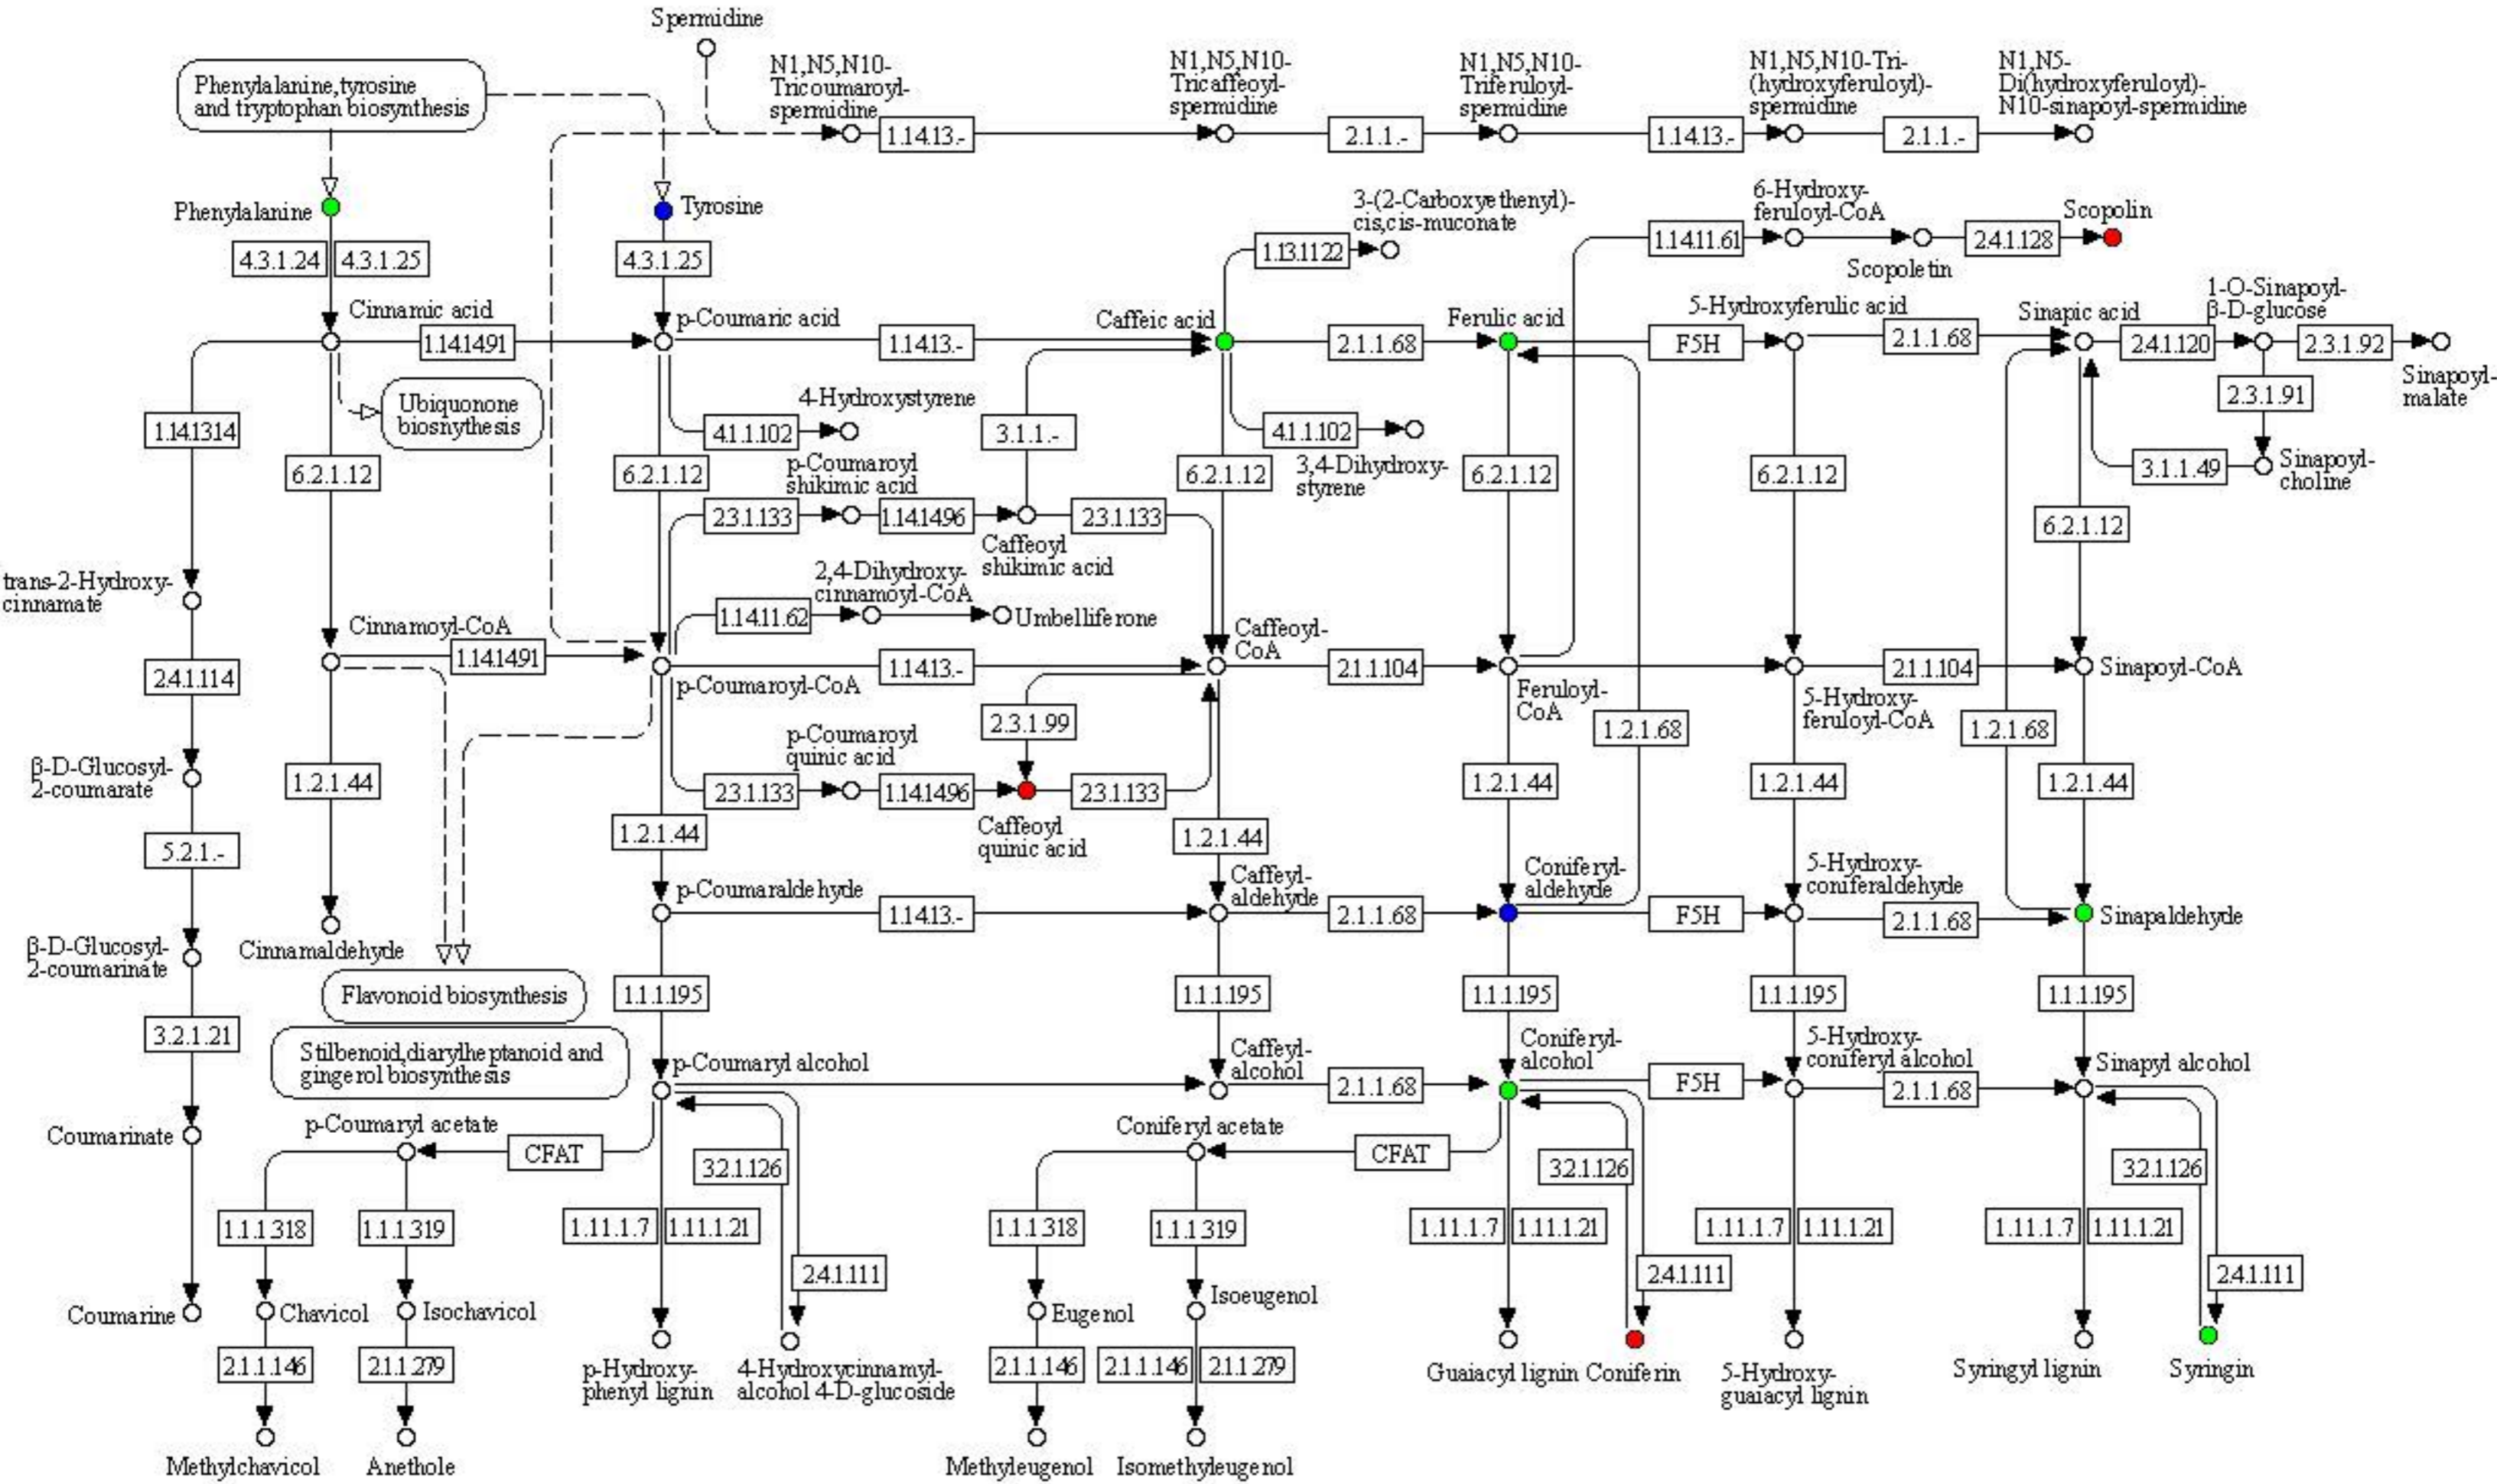

Supplement: Fig._S3.pdf [file Fig._S3.pdf]
