# Supplementary material for: Analysis of metabolites in young and mature Docynia delavayi (Franch.) Schneid leaves using UPLC-ESI-MS/MS
Source: PeerJ. 2022 Feb 4;10:e12844. doi: 10.7717/peerj.12844 (PMC8820213; doi:10.7717/peerj.12844)
Supplement: Supplemental Information 1 [file peerj-10-12844-s001.xlsx]

## Sheet: Sheet1
Index	Q1 (Da)	Q3 (Da)	Molecular Weight (Da)	Formula	Ionization model	Compounds	Class I	Class II	CAS	Level	O-1	O-2	O-3	Y-1	Y-2	Y-3	mix01	mix02	mix03	cpd_ID	kegg_map
Lmqp000873	101.02	55.02	100.018	C4H4O3	[M+H]+	Succinic anhydride	Organic acids	Organic acids	108-30-5	B	62366	64676	63521	88623	78399	83500	140000	145000	148000	--	--
mws4052	102.05	56.05	101.048	C4H7NO2	[M+H]+	1-Aminocyclopropane-1-carboxylic acid	Others	Others	22059-21-8	B	157150	137310	147230	58638	51584	55100	73400	66600	78300	C01234	ko00270,ko01100,ko01110
pme3017	104.07	58	103.063	C4H9NO2	[M+H]+	2-Aminoisobutyric acid	Amino acids and derivatives	Amino acids and derivatives	62-57-7	B	318440	342990	330715	318300	350870	335000	191000	189000	176000	C03665	--
pme3033	104.07	86	103.063	C4H9NO2	[M+H]+	N,N-Dimethylglycine	Amino acids and derivatives	Amino acids and derivatives	1118-68-9	B	27624	29010	28317	28338	36498	32400	24800	22000	25100	C01026	ko00260,ko01100
pme3011	104.07	68.8	103.063	C4H9NO2	[M+H]+	γ-Aminobutyric acid	Organic acids	Organic acids	1956/12/2	B	21061	20679	20870	33748	36660	35200	27800	26600	36700	C00334	ko00250,ko00330,ko00410,ko00650,ko00760,ko01100
pmb0484	104.1	60.1	103.091	C5H13NO	[M+H]+	Choline	Alkaloids	Alkaloids	62-49-7	A	2824200	2828400	2826300	3001300	2709100	2860000	1630000	1610000	1440000	C00114	ko00260,ko00564,ko01100,ko02010
mws0890	104.04	74.02	105.043	C3H7NO3	[M-H]-	D-Serine	Amino acids and derivatives	Amino acids and derivatives	312-84-5	B	6094	5178.8	5636.4	6713.2	6811.7	6760	6670	8590	8850	C00740	ko00260,ko01100,ko01502
HJAP104	107.05	77.04	106.041	C7H6O	[M+H]+	Benzaldehyde	Others	Others	100-52-7	B	1033900	1027400	1030650	1060600	1104700	1080000	910000	920000	977000	--	--
mws0255	112.05	95	111.043	C4H5N3O	[M+H]+	Cytosine	Nucleotides and derivatives	Nucleotides and derivatives	71-30-7	B	48630	55662	52146	188500	199440	194000	55900	69100	72800	C00380	ko00240,ko01100
pme2122	112.09	95	111.08	C5H9N3	[M+H]+	Histamine	Amino acids and derivatives	Amino acids and derivatives	51-45-6	B	44399	49459	46929	178890	180620	180000	57300	59900	72000	C00388	ko00340,ko01100,ko01110
pme0257	111.02	80	112.027	C4H4N2O2	[M-H]-	Uracil	Nucleotides and derivatives	Nucleotides and derivatives	66-22-8	B	334590	345730	340160	202290	206250	204000	198000	154000	166000	C00106	ko00240,ko00410,ko00770,ko01100
pme0006	116.07	70.1	115.063	C5H9NO2	[M+H]+	L-Proline	Amino acids and derivatives	Amino acids and derivatives	147-85-3	A	1936500	2033100	1984800	3556600	3925900	3740000	2120000	2160000	2310000	C00148	ko00330,ko00332,ko00970,ko01100,ko01110,ko01230,ko02010
mws0376	115	71	116.011	C4H4O4	[M-H]-	Fumaric acid	Organic acids	Organic acids	110-17-8	B	114700	54616	84658	49580	65849	57700	63300	60400	63600	C00122	ko00020,ko00190,ko00220,ko00250,ko00350,ko00360,ko00620,ko00650,ko00760,ko01100,ko01110,ko01200
mws0823	115.04	71	116.047	C5H8O3	[M-H]-	3-Methyl-2-Oxobutanoic acid	Organic acids	Organic acids	759-05-7	B	38138	32297	35217.5	61898	81008	71500	109000	84200	97100	C00141	ko00280,ko00290,ko00770,ko00966,ko01100,ko01110,ko01210,ko01230
pmb1096	118.07	91	117.058	C8H7N	[M+H]+	Indole	Alkaloids	Plumerane	120-72-9	B	1840	946.22	1393.11	22199	24252	23200	6650	9210	6750	C00463	ko00380,ko00400,ko00402,ko01100,ko01110
mws2628	118.09	87.05	117.07	C5H11NO2	[M+H]+	N-Methyl-4-aminobutyric acid	Organic acids	Organic acids	1119-48-8	B	1194.1	1882.5	1538.3	6749.5	4967	5860	2790	1330	3850	C15987	ko00760,ko01100
mws0256	118.09	72.1	117.079	C5H11NO2	[M+H]+	L-Valine	Amino acids and derivatives	Amino acids and derivatives	72-18-4	A	2477200	2516900	2497050	4126700	4625800	4380000	4670000	4850000	4720000	C00183	ko00280,ko00290,ko00311,ko00460,ko00770,ko00966,ko00970,ko01100,ko01110,ko01210,ko01230,ko02010
mws0191	118.09	59	117.079	C5H11NO2	[M+H]+	Betaine	Alkaloids	Alkaloids	107-43-7	A	1128500	1146100	1137300	385470	422940	404000	624000	569000	610000	C00719	ko00260,ko01100,ko02010
mws0192	117.02	73	118.027	C4H6O4	[M-H]-	Succinic acid	Organic acids	Organic acids	110-15-6	A	20118000	18161000	19139500	16427000	15797000	16100000	22100000	21300000	22400000	C00042	ko00020,ko00190,ko00250,ko00310,ko00350,ko00360,ko00620,ko00630,ko00640,ko00650,ko00760,ko00920,ko01100,ko01110,ko01200
mws0147	117.06	59	118.063	C5H10O3	[M-H]-	3-Hydroxy-3-methyl butyric acid	Organic acids	Organic acids	625-08-1	A	63353	69451	66402	214890	222490	219000	69700	74600	78000	--	--
mws0230	120.07	74	119.058	C4H9NO3	[M+H]+	L-(-)-Threonine	Amino acids and derivatives	Amino acids and derivatives	72-19-5	B	280560	275230	277895	169990	163380	167000	182000	151000	187000	C00188	ko00260,ko00261,ko00290,ko00860,ko00970,ko01100,ko01110,ko01230,ko02010
mws0671	120.07	74.1	119.058	C4H9NO3	[M+H]+	L-Homoserine	Organic acids	Organic acids	672-15-1	B	372520	323080	347800	176790	233130	205000	253000	218000	243000	C00263	ko00260,ko00270,ko00300,ko00920,ko01100,ko01110,ko01230
pmp001287	120.08	103.05	119.073	C8H9N	[M+H]+	N-Benzylmethylene isomethylamine	Alkaloids	Alkaloids	-	A	391650	461230	426440	2315800	2554300	2440000	1270000	1340000	1380000	--	--
mws0491	122.1	105	121.089	C8H11N	[M+H]+	Phenethylamine	Others	Others	64-04-0	B	12869	14755	13812	31797	39615	35700	43100	43500	54800	C05332	ko00360,ko01100
mws0628	121.03	92	122.037	C7H6O2	[M-H]-	4-Hydroxybenzaldehyde	Phenolic acids	Phenolic acids	123-08-0	A	193240	225420	209330	422260	442650	432000	205000	233000	198000	C00633	ko01100
mws0133	123.06	79.9	122.048	C6H6N2O	[M+H]+	Nicotinamide	Others	Vitamin	98-92-0	B	82384	93303	87843.5	239160	268980	254000	100000	99600	109000	C00153	ko00760,ko01100
pme0490	124.04	78	123.032	C6H5NO2	[M+H]+	Nicotinic acid	Others	Vitamin	59-67-6	B	16282	16305	16293.5	96704	110050	103000	38400	44500	40800	C00253	ko00760,ko00960,ko01100,ko01110
mws0236	124.01	80	125.015	C2H7NO3S	[M-H]-	2-Aminoethanesulfonic acid	Organic acids	Organic acids	107-35-7	B	1344.7	2686.1	2015.4	2153.5	2356.6	2260	3490	2360	3250	C00245	ko00430,ko00920,ko01100,ko02010
Hmpp000689	127.04	69.03	126.03	C6H6O3	[M+H]+	Pyrogallol	Others	Others	87-66-1	A	202470	168590	185530	82874	95575	89200	985000	867000	830000	--	--
Wmzp000668	127.04	53.04	126.032	C6H6O3	[M+H]+	Pyrogallic acid	Phenolic acids	Phenolic acids	-	A	113210	98469	105840	9	65191	32600	453000	445000	450000	--	--
pmp001086	127.04	97	126.032	C6H6O3	[M+H]+	5-Hydroxymethylfurfural	Phenolic acids	Phenolic acids	67-47-0	A	131520	93933	112726	90623	140110	115000	392000	361000	341000	C11101	--
Rfmb319	130.09	84.08	129.079	C6H11NO2	[M+H]+	Pipecolic acid	Amino acids and derivatives	Amino acids and derivatives	4043-87-2	B	173610	191290	182450	2141900	1831600	1990000	583000	802000	822000	--	--
mws0425	129.02	85	130.027	C5H6O4	[M-H]-	Citraconic acid	Organic acids	Organic acids	498-23-7	B	46759	43711	45235	1308400	2089000	1700000	3670000	3920000	3900000	C02226	ko00290,ko00660,ko01100,ko01210
pme2693	131.12	114.09	130.111	C6H14N2O	[M+H]+	N-Acetylputrescine	Alkaloids	Phenolamine	18233-70-0	B	7882.3	9721.7	8802	26952	41687	34300	20200	21300	25500	C02714	ko00330,ko01100
pmb0501	131.13	114.1	130.122	C5H14N4	[M+H]+	Agmatine	Alkaloids	Phenolamine	306-60-5	B	11039	9072.2	10055.6	26129	29742	27900	24300	19600	22600	C00179	ko00330,ko01100
mws0216	132.07	86	131.058	C5H9NO3	[M+H]+	Trans-4-Hydroxy-L-proline	Amino acids and derivatives	Amino acids and derivatives	51-35-4	B	138410	99530	118970	154700	172810	164000	127000	97200	113000	C01157	ko00330,ko01100,ko02010
mws0227	132.1	86.2	131.095	C6H13NO2	[M+H]+	L-Leucine	Amino acids and derivatives	Amino acids and derivatives	61-90-5	A	3122900	3482100	3302500	4726500	5461700	5090000	4850000	4270000	4920000	C00123	ko00280,ko00290,ko00966,ko00970,ko01100,ko01110,ko01210,ko01230,ko02010
pmp001198	132.1	57.1	131.095	C6H13NO2	[M+H]+	6-Deoxyfagomine	Alkaloids	Alkaloids	197449-09-5	A	148810	148620	148715	203330	242050	223000	216000	184000	221000	--	--
mws0473	131.03	87	132.042	C5H8O4	[M-H]-	2-Methylsuccinic acid	Organic acids	Organic acids	498-21-5	A	216020	228460	222240	17508000	18736000	18100000	5760000	5770000	5790000	--	--
mws0001	133.06	74	132.054	C4H8N2O3	[M+H]+	L-Asparagine	Amino acids and derivatives	Amino acids and derivatives	70-47-3	B	107260	79963	93611.5	80253	64865	72600	538000	652000	536000	C00152	ko00250,ko00460,ko00970,ko01100,ko01110,ko01230
mws0972	131.07	85	132.079	C6H12O3	[M-H]-	5-Hydroxyhexanoic acid	Organic acids	Organic acids	185956-02-9	B	8659.3	9985.3	9322.3	33303	32039	32700	14000	17200	13300	--	--
mws0219	132.03	88	133.038	C4H7NO4	[M-H]-	L-AsparticAcid	Amino acids and derivatives	Amino acids and derivatives	56-84-8	A	901830	873780	887805	335150	341090	338000	660000	716000	644000	C00049	ko00220,ko00250,ko00260,ko00261,ko00270,ko00300,ko00340,ko00410,ko00460,ko00710,ko00760,ko00770,ko00970,ko01100,ko01110,ko01200,ko01210,ko01230,ko02010
pme0040	136.06	119	135.054	C5H5N5	[M+H]+	Adenine	Nucleotides and derivatives	Nucleotides and derivatives	73-24-5	A	3451500	3988400	3719950	25014000	26216000	25600000	4430000	4750000	5320000	C00147	ko00230,ko00908,ko01100
pmb0374	136.06	118.9	135.054	C5H5N5	[M+H]+	Aminopurine	Alkaloids	Alkaloids	452-06-2	A	54121	65741	59931	9	9	9	27500	28900	26000	--	--
pme1173	137.05	110	136.039	C5H4N4O	[M+H]+	Allopurinol	Nucleotides and derivatives	Nucleotides and derivatives	315-30-0	B	9537.9	9624.4	9581.15	61985	61900	61900	12000	12300	11600	--	--
pme0033	137.05	119	136.039	C5H4N4O	[M+H]+	Hypoxanthine	Nucleotides and derivatives	Nucleotides and derivatives	68-94-0	B	15975	21892	18933.5	119850	116400	118000	18500	23200	18100	C00262	ko00230,ko01100
pme2268	138.05	94.07	137.048	C7H7NO2	[M+H]+	Trigonelline	Alkaloids	Alkaloids	535-83-1	A	71916	92448	82182	7327000	7729500	7530000	1490000	1420000	1590000	C01004	ko00760
mws1336	138.06	120	137.048	C7H7NO2	[M+H]+	4-Aminobenzoic acid	Phenolic acids	Phenolic acids	150-13-0	B	1213100	1395200	1304150	1365900	1447900	1410000	844000	904000	851000	C00568	ko00790,ko01100
pme1002	138.09	103	137.084	C8H11NO	[M+H]+	L-Tyramine	Amino acids and derivatives	Amino acids and derivatives	51-67-2	A	11161	14824	12992.5	130690	142590	137000	97000	78700	94100	C00483	ko00350,ko00950,ko01100,ko01110
Lmgn001670	137.03	108.02	138.032	C7H6O3	[M-H]-	Salicylic acid	Phenolic acids	Phenolic acids	69-72-7	A	65677	61539	63608	85631	80751	83200	96400	107000	108000	C00805	ko00360,ko01100,ko01110,ko04075
Hmgn001653	137.02	93.03	138.032	C7H6O3	[M-H]-	3,4-Dihydroxybenzaldehyde	Phenolic acids	Phenolic acids	139-85-5	A	89170	117150	103160	395540	382080	389000	161000	134000	162000	--	--
mws2368	137.06	119.05	138.068	C8H10O2	[M-H]-	Tyrosol	Phenolic acids	Phenolic acids	501-94-0	B	5852.8	5573.6	5713.2	13611	11768	12700	15900	11500	23800	C06044	ko00350,ko01100
pme3207	141.02	59	142.027	C6H6O4	[M-H]-	Trans,trans-Muconic acid	Organic acids	Organic acids	3588-17-8	B	282100	198310	240205	64873	64436	64700	311000	307000	280000	--	--
pmb0764	144.05	113.2	143.04	C6H9NOS	[M+H]+	4-Methyl-5-thiazoleethanol	Others	Others	137-00-8	B	9	9	9	5057.4	4382.2	4720	6570	6880	6800	C04294	ko00730,ko01100
Rfmb320	144.1	84.08	143.095	C7H13NO2	[M+H]+	1,2-N-Methylpipecolic acid	Amino acids and derivatives	Amino acids and derivatives	7730-87-2	B	482630	559250	520940	435910	472270	454000	249000	237000	266000	--	--
pme0295	146.08	86	145.074	C6H11NO3	[M+H]+	4-Acetamidobutyric acid	Organic acids	Organic acids	3025-96-5	B	81587	73659	77623	106130	125930	116000	58300	60100	60800	C02946	ko00330,ko01100
mws0567	146.09	87	145.085	C5H11N3O2	[M+H]+	4-Guanidinobutyric acid	Organic acids	Organic acids	463-00-3	B	130260	133480	131870	365700	413660	390000	177000	187000	160000	C01035	ko00330,ko01100
mws0208	145.05	101	146.058	C6H10O4	[M-H]-	Adipic Acid	Organic acids	Organic acids	124-04-9	A	54073	70091	62082	493990	412840	453000	188000	187000	185000	C06104	ko01100
pme0193	147.08	84	146.069	C5H10N2O3	[M+H]+	L-Glutamine	Amino acids and derivatives	Amino acids and derivatives	56-85-9	B	40277	39008	39642.5	145370	136380	141000	157000	150000	138000	C00064	ko00220,ko00230,ko00240,ko00250,ko00630,ko00910,ko00970,ko01100,ko01230,ko02010
pme0026	147.11	84	146.106	C6H14N2O2	[M+H]+	L-(+)-Lysine	Amino acids and derivatives	Amino acids and derivatives	56-87-1	A	47085	42358	44721.5	171550	182310	177000	189000	184000	189000	C00047	ko00300,ko00310,ko00780,ko00960,ko00970,ko01100,ko01110,ko01210,ko01230,ko02010
pme1691	147.13	87.2	146.118	C7H16NO2	[M+H]+	Acetylcholine	Alkaloids	Alkaloids	60-31-1	B	626340	528140	577240	738800	937880	838000	599000	690000	725000	C08201	--
mws1050	148.06	88	147.053	C5H9NO4	[M+H]+	O-Acetylserine	Amino acids and derivatives	Amino acids and derivatives	5147-00-2	B	249840	225570	237705	4102300	4102000	4100000	2350000	2000000	2580000	C00979	ko00270,ko00908,ko00920,ko01100,ko01110,ko01200,ko01230,ko04122
pme0014	148.06	84	147.053	C5H9NO4	[M+H]+	L-Glutamic acid	Amino acids and derivatives	Amino acids and derivatives	56-86-0	A	28106000	23558000	25832000	12273000	11992000	12100000	15800000	14600000	15300000	C00025	ko00220,ko00250,ko00330,ko00332,ko00340,ko00430,ko00480,ko00630,ko00650,ko00660,ko00860,ko00910,ko00970,ko01100,ko01110,ko01200,ko01210,ko01230,ko02010
pmp001285	149.02	65.04	148.016	C8H4O3	[M+H]+	Phthalic anhydride	Phenolic acids	Phenolic acids	85-44-9	A	180250	176790	178520	390330	249230	320000	288000	289000	291000	--	--
pme3154	147.07	59	148.074	C6H12O4	[M-H]-	(Rs)-Mevalonic acid	Organic acids	Organic acids	150-97-0	B	112750	140120	126435	69499	134840	102000	936000	696000	959000	--	--
Lmgp000796	150.06	61.01	149.048	C8H7NO2	[M+H]+	p-hydroxymandelonitrile	Alkaloids	Alkaloids	-	B	46514	54331	50422.5	192650	210420	202000	132000	139000	146000	--	--
pme1210	150.06	61	149.051	C5H11NO2S	[M+H]+	L-Methionine	Amino acids and derivatives	Amino acids and derivatives	63-68-3	B	57497	53649	55573	203940	209470	207000	118000	138000	140000	C00073	ko00270,ko00966,ko00970,ko01100,ko01110,ko01210,ko01230
mws0847	150.08	133	149.07	C6H7N5	[M+H]+	1-Methyladenine	Nucleotides and derivatives	Nucleotides and derivatives	5142-22-3	B	9997.8	10931	10464.4	11276	18764	15000	7890	6890	5730	C02216	--
mws0262	149.01	87	150.016	C4H6O6	[M-H]-	L-(+)-Tartaric acid	Organic acids	Organic acids	87-69-4	B	21819	16891	19355	25607	35027	30300	116000	118000	127000	C00898	ko00630,ko01100
mws1499	149.05	59.01	150.053	C5H10O5	[M-H]-	D-(-)-Arabinose	Others	Saccharides and Alcohols	10323-20-3	B	76771	72962	74866.5	87153	123560	105000	141000	154000	151000	--	--
pme0183	152.06	135	151.049	C5H5N5O	[M+H]+	2-Hydroxy-6-aminopurine	Nucleotides and derivatives	Nucleotides and derivatives	3373-53-3	B	15299	14135	14717	130830	138310	135000	49500	44200	51300	--	--
pme1109	152.06	135	151.049	C5H5N5O	[M+H]+	Guanine	Nucleotides and derivatives	Nucleotides and derivatives	73-40-5	B	26944	25898	26421	508900	563490	536000	104000	103000	106000	C00242	ko00230,ko01100
pme0256	151.03	151	152.033	C5H4N4O2	[M-H]-	Xanthine	Nucleotides and derivatives	Nucleotides and derivatives	69-89-6	B	20297	25704	23000.5	17324	25755	21500	21900	11300	17800	C00385	ko00230,ko00232,ko01100,ko01110
mws0458	151.04	136	152.047	C8H8O3	[M-H]-	Vanillin	Phenolic acids	Phenolic acids	121-33-5	B	132250	112770	122510	314180	366170	340000	304000	284000	321000	C00755	ko00998,ko01100,ko01110
pme0513	151.06	59	152.068	C5H12O5	[M-H]-	Xylitol	Others	Saccharides and Alcohols	87-99-0	B	26653	31816	29234.5	79374	77903	78600	16000	17600	15500	C00379	ko00040,ko01100,ko02010
mws0437	151.06	71	152.068	C5H12O5	[M-H]-	D-Arabitol	Others	Saccharides and Alcohols	488-82-4	B	30651	33067	31859	124490	129160	127000	25800	24900	23700	C01904	ko00040,ko01100
mws0438	151.06	59	152.068	C5H12O5	[M-H]-	L-Arabitol	Others	Saccharides and Alcohols	7643-75-6	B	37035	41718	39376.5	102720	119680	111000	24900	23600	23900	C00532	ko00040,ko01100
mws0213	151.06	71	152.068	C5H12O5	[M-H]-	Ribitol	Others	Saccharides and Alcohols	488-81-3	B	50816	47069	48942.5	199980	219390	210000	43700	36300	48100	C00474	ko00040,ko00740,ko01100
mws0183	153.02	109	154.027	C7H6O4	[M-H]-	Protocatechuic acid	Phenolic acids	Phenolic acids	99-50-3	A	168270	179700	173985	201580	188650	195000	195000	212000	215000	C00230	ko01100,ko01110
pmb3099	153.03	125	154.039	C4H11O4P	[M-H]-	Diethyl phosphate	Organic acids	Organic acids	598-02-7	B	124380	97249	110814	186120	142070	164000	143000	128000	142000	C06608	--
mws0254	156.08	110	155.069	C6H9N3O2	[M+H]+	L-Histidine	Amino acids and derivatives	Amino acids and derivatives	71-00-1	B	15857	16218	16037.5	14095	15331	14700	36200	40400	38800	C00135	ko00340,ko00410,ko00970,ko01100,ko01110,ko01230,ko02010
pme3382	160.06	98	161.069	C6H11NO4	[M-H]-	N-Acetylthreonine	Amino acids and derivatives	Amino acids and derivatives	17093-74-2	B	54577	68508	61542.5	140100	150370	145000	133000	114000	127000	--	--
pme2914	161.05	99	162.053	C6H10O5	[M-H]-	3-Hydroxy-3-methylpentane-1,5-dioic acid	Amino acids and derivatives	Amino acids and derivatives	503-49-1	A	5574900	5459300	5517100	18192000	21177000	19700000	16000000	16000000	16600000	C03761	--
pmf0440	163.08	91.1	162.068	C10H10O2	[M+H]+	4-MethoxycinnaMaldehyde	Phenolic acids	Phenolic acids	1963-36-6	B	53271	44818	49044.5	56102	53551	54800	45800	53700	50100	--	--
mws1478	163.12	130	162.116	C10H14N2	[M+H]+	Nicotine	Alkaloids	Alkaloids	1954/11/5	A	334880	327320	331100	193240	277550	235000	870000	857000	946000	C00745	ko00960,ko01110
pme1419	164.07	104	163.067	C6H13NO2S	[M+H]+	Methionine methyl ester	Amino acids and derivatives	Amino acids and derivatives	10332-17-9	B	21413	23425	22419	23449	21068	22300	11900	10100	13800	--	--
pme2617	166.05	102	165.046	C5H11NO3S	[M+H]+	Methionine sulfoxide	Amino acids and derivatives	Amino acids and derivatives	62697-73-8	B	7993800	8020100	8006950	7718500	7791500	7760000	6470000	7260000	6510000	--	--
pme0021	166.09	120.08	165.07	C9H11NO2	[M+H]+	L-Phenylalanine	Amino acids and derivatives	Amino acids and derivatives	63-91-2	A	1531100	1631400	1581250	9514000	10525000	10000000	5050000	5110000	5780000	C00079	ko00360,ko00400,ko00460,ko00940,ko00960,ko00966,ko00970,ko00998,ko01100,ko01110,ko01210,ko01230,ko02010
pme0281	165.02	121	166.027	C8H6O4	[M-H]-	Terephthalic acid	Phenolic acids	Phenolic acids	100-21-0	A	954490	961030	957760	1991700	2358400	2180000	1800000	1590000	1880000	C06337	ko01100
mws0344	165.04	75	166.048	C5H10O6	[M-H]-	D-Xylonic acid	Organic acids	Organic acids	526-91-0	B	4392400	3880600	4136500	2508100	2434600	2470000	1860000	2010000	1540000	C00502	ko00040,ko01100
Lmnp001551	167.07	91.05	166.063	C9H10O3	[M+H]+	3-methoxy-4-hydroxy-acetophenone	Phenolic acids	Phenolic acids	-	B	229580	265900	247740	334110	301690	318000	164000	166000	177000	--	--
Lmrn003000	165.06	103.06	166.063	C9H10O3	[M-H]-	2-hydroxy-3-phenylpropanoic acid	Organic acids	Organic acids	828-01-3	A	2260500	2507300	2383900	11588000	12720000	12200000	4980000	4790000	5110000	--	--
mws0467	165.06	119	166.063	C9H10O3	[M-H]-	3-(4-Hydroxyphenyl)-propionic acid	Phenolic acids	Phenolic acids	501-97-3	B	416970	420060	418515	1005800	1017800	1010000	677000	794000	775000	C01744	--
mws0851	143.11	143.11	166.097	C8H15NaO2	[M-Na]-	Sodium Valproate	Organic acids	Organic acids	1069-66-5	B	3049400	3155800	3102600	2706700	2818500	2760000	5460000	5620000	5350000	--	--
Lmdp003146	167.11	93.07	166.099	C10H14O2	[M+H]+	Rhododendrol	Others	Others	501-96-2	A	235160	231470	233315	137010	133290	135000	108000	145000	152000	--	--
pmn001681	165.09	149.06	166.099	C10H14O2	[M-H]-	1-(4-Methoxyphenyl)-1-propanol	Phenolic acids	Phenolic acids	5349-60-0	B	8769.9	13531	11150.5	13518	12090	12800	15800	14200	25100	--	--
mws0028	167.03	108	168.042	C8H8O4	[M-H]-	Vanillic acid	Phenolic acids	Phenolic acids	121-34-6	B	32461	37767	35114	61508	70526	66000	22400	19300	30700	C06672	--
Hmbp001276	169.05	65.03	168.042	C8H8O4	[M+H]+	Gallacetophenone	Others	Others	528-21-2	A	551910	622600	587255	59114	57089	58100	246000	227000	227000	--	--
pme1383	170.08	134.1	169.074	C8H11NO3	[M+H]+	Pyridoxine	Others	Vitamin	65-23-6	B	459120	487320	473220	130080	161580	146000	154000	170000	166000	C00314	ko00750,ko01100
pme0181	170.09	124	169.085	C7H11N3O2	[M+H]+	1-Methylhistidine	Amino acids and derivatives	Amino acids and derivatives	368-16-1	B	9	19290	9649.5	1558700	1659700	1610000	427000	360000	397000	C01152	ko00340,ko01100
pme0124	173.09	115.5	172.085	C7H12N2O3	[M+H]+	Glycyl-L-proline	Amino acids and derivatives	Amino acids and derivatives	704-15-4	B	6898.3	5006.8	5952.55	17679	12511	15100	6670	8580	6440	--	--
pme3009	175.02	99	174.016	C6H6O6	[M+H]+	Trans-Citridic acid	Organic acids	Organic acids	4023-65-8	B	215410	268670	242040	83822	86149	85000	466000	430000	327000	C02341	ko00660,ko01100
mws0154	173.05	93	174.053	C7H10O5	[M-H]-	Shikimic acid	Organic acids	Organic acids	138-59-0	B	349100	363460	356280	391230	422020	407000	174000	181000	216000	C00493	ko00400,ko01100,ko01110,ko01230
mws1401	175.11	84	174.1	C7H14N2O3	[M+H]+	L-theanine	Amino acids and derivatives	Amino acids and derivatives	3081-61-6	B	4806.2	4095.9	4451.05	8310.8	9348	8830	132000	123000	142000	C01047	--
mws0260	175.12	116	174.112	C6H14N4O2	[M+H]+	L-(+)-Arginine	Amino acids and derivatives	Amino acids and derivatives	74-79-3	A	310830	368350	339590	3289700	3011600	3150000	1330000	1520000	1500000	C00062	ko00220,ko00261,ko00330,ko00472,ko00970,ko01100,ko01110,ko01230,ko02010
pme0008	176.1	113	175.096	C6H13N3O3	[M+H]+	L-Citrulline	Amino acids and derivatives	Amino acids and derivatives	372-75-8	B	94577	77657	86117	111210	160960	136000	103000	113000	119000	C00327	ko00220,ko01100,ko01110,ko01230
Hmfn00531	175.02	87.01	176.032	C6H8O6	[M-H]-	L-Ascorbic acid	Others	Vitamin	50-81-7	A	771590	2020600	1396095	29104	25671	27400	82500	34300	72500	C00072	ko00053,ko00480,ko01100,ko01110
mws1013	177.02	133.2	178.027	C9H6O4	[M-H]-	Esculetin	Lignans and Coumarins	Coumarins	305-01-1	B	76664	60092	68378	780550	869720	825000	98100	124000	75100	C09263	--
mws0009	179.07	91	178.063	C10H10O3	[M+H]+	Coniferaldehyde	Phenolic acids	Phenolic acids	20649-42-7	B	19470	20568	20019	21770	29282	25500	15600	15000	12300	C02666	ko00940,ko01100,ko01110
mws1200	177.06	145	178.063	C10H10O3	[M-H]-	Trans-4-Hydroxycinnamic Acid Methyl Ester	Phenolic acids	Phenolic acids	19367-38-5	A	2744600	3078400	2911500	13861000	14692000	14300000	4430000	4490000	4320000	--	--
mws2212	179.03	135.05	180.042	C9H8O4	[M-H]-	Caffeic acid	Phenolic acids	Phenolic acids	331-39-5	A	816330	907050	861690	4087300	4670000	4380000	1710000	1610000	1680000	C01197	ko00940,ko01100,ko01110
mws4170	179.06	59.01	180.063	C6H12O6	[M-H]-	D-Glucose	Others	Saccharides and Alcohols	14431-43-7	A	344550	353730	349140	623920	630500	627000	4950000	5190000	5450000	C00031	ko00010,ko00030,ko00052,ko00500,ko00520,ko00901,ko01100,ko01110,ko02010,ko04933
pme0516	179.06	87	180.063	C6H12O6	[M-H]-	Inositol	Others	Saccharides and Alcohols	87-89-8	B	112240	117880	115060	57547	41313	49400	109000	102000	111000	C00137	ko00052,ko00053,ko00562,ko01100,ko01110,ko02010,ko04070
mws0663	181.07	124	180.065	C7H8N4O2	[M+H]+	1,7-Dimethylxanthine	Nucleotides and derivatives	Nucleotides and derivatives	611-59-6	B	6480.7	9506.6	7993.65	4600.3	9129.2	6860	10800	15100	13000	C13747	ko00232,ko01100,ko01110
mws0093	179.07	146	180.079	C10H12O3	[M-H]-	Coniferyl alcohol	Phenolic acids	Phenolic acids	458-35-5	B	16022	14831	15426.5	66026	89770	77900	44700	46400	38700	C00590	ko00940,ko00998,ko01100,ko01110
mws0250	182.08	136.1	181.074	C9H11NO3	[M+H]+	L-(-)-Tyrosine	Amino acids and derivatives	Amino acids and derivatives	60-18-4	A	1239600	1322800	1281200	2327600	2535000	2430000	2390000	2500000	2470000	C00082	ko00130,ko00261,ko00350,ko00360,ko00400,ko00460,ko00730,ko00940,ko00950,ko00965,ko00966,ko00970,ko00998,ko01100,ko01110,ko01210,ko01230
Hmtn001288	181.05	135.04	182.058	C9H10O4	[M-H]-	Methyl-(2,4-dihydroxyphenyl)acetate	Phenolic acids	Phenolic acids	-	B	12465	9458	10961.5	23643	28386	26000	14100	14100	16600	--	--
mws1350	181.05	151	182.058	C9H10O4	[M-H]-	Syringic Aldehyde	Phenolic acids	Phenolic acids	134-96-3	B	59270	44703	51986.5	69526	73048	71300	84600	67600	80600	--	--
mws0214	181.07	71	182.079	C6H14O6	[M-H]-	D-Sorbitol	Others	Saccharides and Alcohols	50-70-4	A	15692000	16666000	16179000	17535000	18353000	17900000	7820000	7960000	8640000	C00794	ko00051,ko00052,ko01100,ko02010
pme2237	181.07	101	182.079	C6H14O6	[M-H]-	Dulcitol	Others	Saccharides and Alcohols	608-66-2	A	19137000	20316000	19726500	21347000	22081000	21700000	10300000	11400000	10600000	C01697	ko00052,ko01100
pme2596	184.06	148	183.053	C8H9NO4	[M+H]+	4-Pyridoxic acid	Others	Vitamin	82-82-6	B	312620	356000	334310	51552	59971	55800	125000	132000	137000	C00847	ko00750,ko01100
mws0752	185.15	185.16	186.162	C11H22O2	[M-H]-	Undecylic Acid	Lipids	Free fatty acids	112-37-8	A	479410	435790	457600	889620	964070	927000	668000	693000	692000	--	--
pme0137	187.07	125	188.08	C7H12N2O4	[M-H]-	N-α-Acetyl-L-glutamine	Amino acids and derivatives	Amino acids and derivatives	2490-97-3	B	1059100	1098900	1079000	750750	824210	787000	2070000	1970000	2180000	--	--
mws0237	187.1	125	188.105	C9H16O4	[M-H]-	Anchoic Acid	Organic acids	Organic acids	123-99-9	B	186560	201350	193955	214420	205040	210000	290000	287000	294000	C08261	--
pme0122	189.12	126	188.116	C8H16N2O3	[M+H]+	N6-Acetyl-L-lysine	Amino acids and derivatives	Amino acids and derivatives	692-04-6	B	4807.9	5136.2	4972.05	12640	13539	13100	11400	17900	17400	C02727	ko00310,ko01100
mws0736	189.12	86	188.116	C8H16N2O3	[M+H]+	N-Glycyl-L-leucine	Amino acids and derivatives	Amino acids and derivatives	869-19-2	B	30952	36643	33797.5	137470	146590	142000	67900	62200	81900	C02155	--
pme3388	189.13	144	188.127	C7H16N4O2	[M+H]+	H-HomoArg-OH	Amino acids and derivatives	Amino acids and derivatives	156-86-5	B	5023.4	4272	4647.7	69469	82476	76000	18400	21000	19200	C01924	--
pme0278	191.1	128	190.095	C7H14N2O4	[M+H]+	2,6-Diaminooimelic acid	Amino acids and derivatives	Amino acids and derivatives	583-93-7	B	217020	214060	215540	46767	58914	52800	52200	52100	59300	C00666	ko00300,ko01100,ko01110,ko01230
mws1611	191.11	173.4	190.099	C12H14O2	[M+H]+	Ligustilide	Others	Others	4431-01-0	B	9	9	9	1100.3	1609.9	1360	87800	102000	88700	C16987	--
mws0281	191.02	111.01	192.027	C6H8O7	[M-H]-	Citric Acid	Organic acids	Organic acids	77-92-9	A	31819000	36115000	33967000	58203000	58963000	58600000	24600000	23300000	23600000	C00158	ko00020,ko00250,ko00630,ko01100,ko01110,ko01200,ko01210,ko01230
Hmjp002337	193.04	133.03	192.033	C10H8O4	[M+H]+	Isoscopoletin (6-Hydroxy-7-Methoxycoumarin)	Lignans and Coumarins	Coumarins	776-86-3	B	251580	326420	289000	53768	72643	63200	145000	153000	165000	--	--
mws0277	191.06	85	192.063	C7H12O6	[M-H]-	Quinic Acid	Organic acids	Organic acids	77-95-2	A	353650	374260	363955	637290	642400	640000	1030000	1190000	1050000	C00296	ko00400,ko01100
mws1189	193.04	72.8	194.033	C6H10O7	[M-H]-	D-Galacturonic acid(Gal A)	Organic acids	Organic acids	685-73-4	B	83665	70344	77004.5	109560	120980	115000	121000	104000	105000	C00333	ko00040,ko00053,ko00520,ko01100,ko02010
mws0014	193.05	134.01	194.058	C10H10O4	[M-H]-	Ferulic acid	Phenolic acids	Phenolic acids	537-98-4	A	142220	155620	148920	998440	1104200	1050000	395000	356000	410000	C01494	ko00940,ko01100,ko01110
mws2104	193.07	99.01	194.079	C7H14O6	[M-H]-	D-Pinitol	Others	Others	10284-63-6	B	120950	123920	122435	122720	133690	128000	101000	110000	131000	--	--
pme0534	195.05	74.9	196.058	C6H12O7	[M-H]-	Gluconic acid	Others	Saccharides and Alcohols	526-95-4	A	2104900	1994500	2049700	2088700	2202400	2150000	1460000	1770000	1440000	C00257	ko00030,ko01100,ko01110,ko01200
mws0027	197.05	123	198.053	C9H10O5	[M-H]-	Syringic acid	Phenolic acids	Phenolic acids	530-57-4	B	28166	25526	26846	43359	49583	46500	22600	19000	19400	C10833	--
pmb2640	199.17	181	200.178	C12H24O2	[M-H]-	Lauric acid	Lipids	Free fatty acids	143-07-7	A	16196	18664	17430	9476.7	10323	9900	9570	9880	9630	C02679	ko00061,ko01100,ko01110
mws5037	203.14	86.1	202.132	C9H18N2O3	[M+H]+	Alanylleucine	Amino acids and derivatives	Amino acids and derivatives	1999-42-4	B	9362	15109	12235.5	69520	71854	70700	33200	29400	40600	--	--
mws0018	203.22	83	202.216	C10H26N4	[M+H]+	Spermine	Alkaloids	Phenolamine	71-44-3	B	14699000	17127000	15913000	14577000	14254000	14400000	13500000	14500000	14800000	C00750	ko00330,ko00410,ko00480,ko01100
mws0282	203.08	116.05	204.09	C11H12N2O2	[M-H]-	L-Tryptophan	Amino acids and derivatives	Amino acids and derivatives	73-22-3	A	283950	289080	286515	4295100	4239500	4270000	1550000	1490000	1540000	C00078	ko00260,ko00380,ko00400,ko00901,ko00966,ko00970,ko00998,ko01100,ko01110,ko01210,ko01230
mws2125	166.98	78.7	205.938	C3H4KO6P	[M-K]-	Phosphoenolpyruvic acid	Organic acids	Organic acids	4265-07-0	B	119810	109630	114720	12825	1377	7100	48500	49900	43200	--	--
Lmln010063	205.16	189.13	206.167	C14H22O	[M-H]-	2,6-Di-t-butylphenol	Phenolic acids	Phenolic acids	128-39-2	B	691390	496960	594175	964270	795510	880000	720000	752000	728000	--	--
pme3443	207.07	192	208.074	C11H12O4	[M-H]-	Sinapinaldehyde	Phenolic acids	Phenolic acids	4206-58-0	B	52718	48605	50661.5	155200	145100	150000	159000	147000	166000	C05610	ko00940,ko01100,ko01110
pmb2620	207.07	133.1	208.074	C11H12O4	[M-H]-	3,4-Dimethoxycinnamic acid	Phenolic acids	Phenolic acids	14737-89-4	B	317280	389210	353245	78296	77175	77700	71100	79500	68800	--	--
mws1212	209.08	177.3	208.074	C11H12O4	[M+H]+	Methyl ferulate	Phenolic acids	Phenolic acids	2309/7/1	B	481550	589490	535520	97817	96573	97200	140000	158000	135000	--	--
Hmcn000192	209.07	59.01	210.073	C7H14O7	[M-H]-	Sedoheptulose	Others	Saccharides and Alcohols	3019-74-7	B	561060	616730	588895	541760	452220	497000	254000	262000	259000	C02076	ko00710,ko01100
Hmln002597	193.05	161.02	216.04	C10H9NaO4	[M-Na]-	Sodium ferulate	Others	Others	-	A	809730	868060	838895	3664000	3875000	3770000	1550000	1620000	1590000	--	--
pme0170	217.13	158	216.122	C8H16N4O3	[M+H]+	N-α-Acetyl-L-arginine	Amino acids and derivatives	Amino acids and derivatives	155-84-0	B	31242	43112	37177	47962	57674	52800	31000	30100	30000	--	--
mws5045	215.17	169.16	216.173	C12H24O3	[M-H]-	12-Hydroxydodecanoic acid	Lipids	Free fatty acids	505-95-3	B	4931.8	3433.8	4182.8	4737.9	4926.3	4830	3720	5210	5330	--	--
pme2566	217.08	199	218.09	C8H14N2O5	[M-H]-	(5-L-Glutamyl)-L-amino acid	Amino acids and derivatives	Amino acids and derivatives	5875-41-2	B	25113	29799	27456	15709	14049	14900	30600	29600	25900	C03740	ko00480,ko01100
Lmrj001698	219.13	60.04	218.127	C9H18N2O4	[M+H]+	Ser-Ile	Amino acids and derivatives	Amino acids and derivatives	-	B	7819.1	9626.8	8722.95	48808	51408	50100	18500	17900	20900	--	--
mws1337	220.12	202.1	219.111	C9H17NO5	[M+H]+	D-Pantothenic Acid	Others	Vitamin	79-83-4	B	141380	200490	170935	932350	883390	908000	392000	417000	444000	C00864	ko00410,ko00770,ko01100,ko01110
Hmyp002656	222.08	130.06	221.068	C11H11NO4	[M+H]+	Methyl dioxindole-3-acetate	Others	Others	57061-18-4	B	211890	195460	203675	24364	37753	31100	69100	66200	75400	--	--
mws4174	222.1	138	221.09	C8H15NO6	[M+H]+	N-Acetyl-β-D-mannosamine	Others	Others	7772-94-3	B	70326	67443	68884.5	115820	146670	131000	116000	111000	108000	--	--
mws2608	222.1	84.05	221.09	C8H15NO6	[M+H]+	N-Acetyl-D-galactosamine	Others	Others	1811-31-0	B	51616	43006	47311	89616	113950	102000	87100	81200	84000	--	--
mws5042	223.11	120.09	222.1	C11H14N2O3	[M+H]+	Glycylphenylalanine	Amino acids and derivatives	Amino acids and derivatives	721-66-4	B	18248	21554	19901	72223	76553	74400	38100	41500	42100	--	--
pmb2643	225.19	207	226.193	C14H26O2	[M-H]-	Myristoleic acid	Lipids	Free fatty acids	544-64-9	B	4527.4	3655.7	4091.55	2943.4	2707.5	2830	3210	2800	2750	C08322	--
pme1194	228.1	112	227.091	C9H13N3O4	[M+H]+	Deoxycytidine	Nucleotides and derivatives	Nucleotides and derivatives	951-77-9	B	15452	15848	15650	45437	56298	50900	13100	9860	14800	C00881	ko00240,ko01100,ko02010
mws0119	227.2	227.2	228.209	C14H28O2	[M-H]-	Myristic Acid	Lipids	Free fatty acids	544-63-8	A	17314000	13812000	15563000	15893000	16601000	16200000	19200000	17400000	16300000	C06424	ko00061,ko01100
mws4176	237.12	120.09	236.116	C12H16N2O3	[M+H]+	DL-Alanyl-DL-phenylalanine	Amino acids and derivatives	Amino acids and derivatives	1999-45-7	B	4068.8	4765.2	4417	17426	15843	16600	8740	5350	9340	--	--
mws0984	236.08	164.06	237.086	C9H11N5O3	[M-H]-	Sepiapterin(L-SEPIAPTERIN)COFACTOR OF NITRIC OX	Nucleotides and derivatives	Nucleotides and derivatives	17094-01-8	B	13611	17325	15468	5860.2	3686.5	4770	9960	7820	10500	C00835	ko00790,ko01100
mws0221	241.03	152	240.024	C6H12N2O4S2	[M+H]+	L-(-)-Cystine	Amino acids and derivatives	Amino acids and derivatives	56-89-3	B	41472	43867	42669.5	5350.7	5275.2	5310	5090	2830	5240	C00491	ko00270,ko01100,ko02010
pme0264	243.1	127	242.09	C10H14N2O5	[M+H]+	Thymidine	Nucleotides and derivatives	Nucleotides and derivatives	50-89-5	B	6737.3	6233.1	6485.2	54792	58475	56600	16200	15600	22100	C00214	ko00240,ko01100
mws0359	241.22	241.22	242.225	C15H30O2	[M-H]-	Pentadecanoic Acid	Lipids	Free fatty acids	1002-84-2	A	125110	39456	82283	65283	138650	102000	225000	172000	199000	--	--
pme3732	244.09	112	243.086	C9H13N3O5	[M+H]+	Cytidine	Nucleotides and derivatives	Nucleotides and derivatives	65-46-3	B	584370	610600	597485	2594000	2668700	2630000	636000	733000	763000	C00475	ko00240,ko01100,ko02010
mws0248	243.06	110	244.07	C9H12N2O6	[M-H]-	Uridine	Nucleotides and derivatives	Nucleotides and derivatives	58-96-8	B	227330	252550	239940	1420900	1470500	1450000	601000	454000	550000	C00299	ko00240,ko01100,ko02010
pme2266	245.1	227	244.088	C10H16N2O3S	[M+H]+	Biotin	Others	Vitamin	58-85-5	B	9	11385	5697	31478	35231	33400	26200	10800	22200	C00120	ko00780,ko01100,ko02010
pmb2591	245.09	203.2	246.1	C13H14N2O3	[M-H]-	Acetyltryptophan	Amino acids and derivatives	Amino acids and derivatives	2280/1/5	A	16689	17896	17292.5	743150	1017900	881000	1030000	1400000	1370000	C03137	--
pme3961	252.11	136	251.102	C10H13N5O3	[M+H]+	Deoxyadenosine	Nucleotides and derivatives	Nucleotides and derivatives	958-09-8	B	179820	210070	194945	114450	125360	120000	76100	87400	77000	C00559	ko00230,ko01100,ko02010
mws0040	255.07	153	254.058	C15H10O4	[M+H]+	Chrysin	Flavonoids	Flavonoid	480-40-0	A	1255800	1370200	1313000	3194500	3895700	3550000	1300000	1310000	1370000	C10028	ko00941
mws0361	253.22	235.19	254.225	C16H30O2	[M-H]-	Palmitoleic Acid	Lipids	Free fatty acids	373-49-9	A	13363	15145	14254	8797	5897.2	7350	7250	7680	7770	C08362	ko00061
mws0120	258.11	104.11	257.103	C8H20NO6P	[M+H]+	Choline alfoscerate	Lipids	PC	28319-77-9	B	93008	71037	82022.5	387550	429420	408000	235000	231000	263000	C00670	ko00564,ko00565
mws1090	259.02	97	260.03	C6H13O9P	[M-H]-	Glucose-1-phosphate	Others	Saccharides and Alcohols	59-56-3	A	32356	27403	29879.5	34288	35708	35000	66800	75400	73900	C00103	ko00010,ko00040,ko00052,ko00500,ko00520,ko00523,ko00561,ko01100,ko01110
pme1184	268.1	152	267.097	C10H13N5O4	[M+H]+	Deoxyguanosine	Nucleotides and derivatives	Nucleotides and derivatives	961-07-9	B	32094	30334	31214	79201	66507	72900	27800	29100	33900	C00330	ko00230,ko01100,ko02010
pme0230	268.1	136.06	267.097	C10H13N5O4	[M+H]+	Adenosine	Nucleotides and derivatives	Nucleotides and derivatives	58-61-7	A	30289000	32747000	31518000	16212000	17268000	16700000	15700000	15900000	16500000	C00212	ko00230,ko01100,ko02010
pme2890	269.06	136	268.055	C8H16N2O4S2	[M+H]+	L-Homocystine	Amino acids and derivatives	Amino acids and derivatives	626-72-2	B	2497	3008.2	2752.6	3739.2	4769.4	4250	6760	9030	7320	C01817	ko00270
mws1662	269.08	226	268.074	C16H12O4	[M+H]+	Tectochrysin	Flavonoids	Flavonoid	520-28-5	B	55729	47821	51775	45875	45462	45700	61100	44400	28600	C11621	--
mws1060	267.07	135	268.081	C10H12N4O5	[M-H]-	9-(β-D-Arabinofuranosyl)hypoxanthine	Nucleotides and derivatives	Nucleotides and derivatives	7013-16-3	B	133930	147580	140755	139230	145010	142000	61300	60900	63200	--	--
mws0383	267.23	267.23	268.24	C17H32O2	[M-H]-	Cis-10-Heptadecenoic Acid	Lipids	Free fatty acids	29743-97-3	A	218050	234930	226490	112310	113820	113000	176000	104000	121000	--	--
mws0063	271.06	215	270.053	C15H10O5	[M+H]+	Genistein	Flavonoids	Isoflavones	446-72-0	B	50012	57190	53601	20128	21341	20700	27200	22800	32100	C06563	ko00943,ko01100,ko01110
Lmmn003323	271.23	225.22	272.235	C16H32O3	[M-H]-	2-hydroxyhexadecanoic acid	Organic acids	Organic acids	764-67-0	A	406210	428910	417560	1766800	2009700	1890000	586000	574000	539000	--	--
pme1201	273.08	167	274.084	C15H14O5	[M-H]-	Phloretin	Flavonoids	Chalcones	60-82-2	A	659500	737170	698335	16856000	17976000	17400000	10900000	10100000	9170000	C00774	ko00941,ko01110
mws1038	277.12	146	278.13	C11H22N2O4S	[M-H]-	(R)-Pantetheine	Others	Others	496-65-1	B	3048.3	1799.9	2424.1	65055	68910	67000	22600	33500	18900	C00831	ko00332,ko00770,ko01110
Lmlp012720	279.16	149.02	278.152	C16H22O4	[M+H]+	Dibutyl phthalate	Phenolic acids	Phenolic acids	84-74-2	A	3536900	3262600	3399750	7130900	4651600	5890000	5550000	5480000	5620000	C14214	--
mws0366	277.22	277.22	278.225	C18H30O2	[M-H]-	γ-Linolenic Acid	Lipids	Free fatty acids	506-26-3	A	11491000	11344000	11417500	13876000	14150000	14000000	9460000	8650000	8540000	C06426	ko00591,ko01040,ko01100
mws0367	277.22	277.22	278.225	C18H30O2	[M-H]-	α-Linolenic Acid	Lipids	Free fatty acids	463-40-1	A	11559000	11387000	11473000	13858000	14082000	14000000	8930000	8540000	8350000	C06427	ko00592,ko01040,ko01100,ko01110
pmb0889	279.23	95.1	278.225	C18H30O2	[M+H]+	Punicic acid	Lipids	Free fatty acids	544-72-9	B	76829	77088	76958.5	223390	226460	225000	120000	120000	133000	C08364	--
Lmhn002926	279.05	163.04	280.058	C13H12O7	[M-H]-	p-coumaroylmalic acid	Phenolic acids	Phenolic acids	-	A	260110	351220	305665	132660	190020	161000	182000	189000	220000	--	--
mws0629	281.11	166	280.106	C13H16N2O5	[M+H]+	Asp-phe	Amino acids and derivatives	Amino acids and derivatives	13433-09-5	B	6073.2	4802.2	5437.7	26281	37460	31900	26600	26800	30800	--	--
YC512118	282.28	247.24	281.272	C18H35NO	[M+H]+	Octadecenoic amide	Others	Others	-	A	33961	11572	22766.5	12932	6813.7	9870	22700	21800	23200	--	--
mws2623	281.25	281.25	282.256	C18H34O2	[M-H]-	11-Octadecanoic acid(Vaccenic acid)	Lipids	Free fatty acids	506-17-2	A	2337700	2492500	2415100	7988200	8154400	8070000	4410000	3190000	2780000	--	--
mws0396	281.25	281.25	282.256	C18H34O2	[M-H]-	Elaidic Acid	Lipids	Free fatty acids	112-79-8	A	6975900	6951300	6963600	21884000	22237000	22100000	13300000	9060000	9270000	--	--
pme1178	284.1	152	283.092	C10H13N5O5	[M+H]+	Guanosine	Nucleotides and derivatives	Nucleotides and derivatives	118-00-3	A	1163000	1361900	1262450	5234400	5943700	5590000	1900000	1920000	2110000	C00387	ko00230,ko01100,ko02010
pme3233	285.08	270	284.068	C16H12O5	[M+H]+	Calycosin	Flavonoids	Isoflavones	20575-57-9	B	4178.1	6303.1	5240.6	8302.5	8005	8150	161000	163000	155000	C01562	ko00943,ko01110
mws0668	283.07	151	284.076	C10H12N4O6	[M-H]-	Xanthosine	Nucleotides and derivatives	Nucleotides and derivatives	146-80-5	B	131990	141770	136880	239630	246730	243000	98100	107000	117000	C01762	ko00230,ko00232,ko01100,ko01110,ko02010
mws1489	283.26	283.26	284.272	C18H36O2	[M-H]-	Stearic Acid	Lipids	Free fatty acids	1957/11/4	A	25899000	25757000	25828000	27605000	48399000	38000000	3340000	2890000	2960000	--	--
Lmgn002843	285.05	199.04	286.048	C15H10O6	[M-H]-	2'-Hydroxyisoflavone	Flavonoids	Isoflavones	-	A	21654	29902	25778	2314000	2512700	2410000	964000	882000	905000	--	--
pme0088	285.04	151	286.048	C15H10O6	[M-H]-	Luteolin	Flavonoids	Flavonoid	491-70-3	A	38882	50330	44606	513620	512440	513000	168000	182000	174000	C01514	ko00941,ko00944,ko01100,ko01110
mws1708	285.1	123.05	286.105	C13H18O7	[M-H]-	Gastrodin	Phenolic acids	Phenolic acids	62499-27-8	B	43890	52130	48010	10692	10939	10800	23300	18700	24200	--	--
mws1521	285.1	121.03	286.105	C13H18O7	[M-H]-	Salicin	Phenolic acids	Phenolic acids	138-52-3	A	12907	13878	13392.5	6364.3	10368	8370	9440	8000	8560	C01451	ko00010
mws1094	287.06	259	288.063	C15H12O6	[M-H]-	Dihydrokaempferol	Flavonoids	Dihydroflavonol	480-20-6	A	5887	7581.1	6734.05	60658	74148	67400	39300	40900	30400	C00974	ko00941,ko01100,ko01110
mws0064	287.06	135	288.063	C15H12O6	[M-H]-	Eriodictyol	Flavonoids	Dihydroflavone	552-58-9	A	1426500	1655600	1541050	72101000	74222000	73200000	35200000	34900000	34200000	C05631	ko00941,ko01100,ko01110
mws1000	287.06	149	288.063	C15H12O6	[M-H]-	Fustin	Flavonoids	Dihydroflavonol	20725-03-5	B	909570	816030	862800	409160	426570	418000	732000	699000	682000	C01378	ko00941
pmn001686	287.22	241.22	288.23	C16H32O4	[M-H]-	10,16-Dihydroxy-palmitic acid	Lipids	Free fatty acids	3233-90-7	A	18520	23063	20791.5	38200	40430	39300	21900	22000	20400	C08285	ko00073
pmb3081	289	97	290.004	C6H11PO11	[M-H]-	Glucarate O-Phosphoric acid	Others	Saccharides and Alcohols	-	B	9	1050600	525304	10042000	12218000	11100000	20100000	18100000	18200000	--	--
pme0460	291.09	139.04	290.079	C15H14O6	[M+H]+	Epicatechin	Flavonoids	Flavanols	490-46-0	A	7046000	7801400	7423700	2328200	2386200	2360000	10300000	9700000	9430000	C09727	ko00941,ko01100,ko01110
mws0054	289.07	245	290.079	C15H14O6	[M-H]-	Catechin	Flavonoids	Flavanols	154-23-4	A	386960	452170	419565	234370	253800	244000	428000	444000	483000	C06562	ko00941,ko01110
pmn001728	289.12	203.08	290.127	C15H18N2O4	[M-H]-	N-Acetyl-DL-tryptophan	Amino acids and derivatives	Amino acids and derivatives	87-32-1	A	9	9	9	209800	261870	236000	406000	367000	439000	--	--
pmb2787	293.21	275.1	294.219	C18H30O3	[M-H]-	9-KODE	Lipids	Free fatty acids	54232-59-6	B	11892	10536	11214	12522	13092	12800	9070	9500	9870	--	--
pmb2786	293.21	275	294.219	C18H30O3	[M-H]-	9-HOTrE	Lipids	Free fatty acids	89886-42-0	B	91931	94838	93384.5	99196	105810	103000	60500	62900	59600	--	--
Lmqp000329	296.07	104.11	295.056	C8H14N3O7P	[M+H]+	5-aminoimidazole ribonucleotide	Nucleotides and derivatives	Nucleotides and derivatives	25635-88-5	A	17274	16800	17037	148590	178650	164000	114000	95300	93700	--	--
pmb2799	295.23	195.2	296.235	C18H32O3	[M-H]-	12,13-EODE	Lipids	Free fatty acids	6799-85-5	A	6212.1	6190.4	6201.25	18634	14906	16800	9060	8320	7620	--	--
pmn001688	295.23	195.14	296.235	C18H32O3	[M-H]-	9S-Hyroxy-10E,12E-octadecadienoic acid	Lipids	Free fatty acids	-	A	108510	103510	106010	303510	313290	308000	164000	160000	152000	--	--
pme1474	298.1	136	297.09	C11H15N5O3S	[M+H]+	5'-Deoxy-5'-(methylthio)adenosine	Nucleotides and derivatives	Nucleotides and derivatives	2457-80-9	A	411190	371600	391395	1240400	1392500	1320000	630000	726000	694000	C00170	ko00270,ko00908,ko01100
pmp001204	299.09	284.1	298.084	C17H14O5	[M+H]+	Apigenin-7,4'-dimethylether	Flavonoids	Flavonoid	5128-44-9	B	27441	27197	27319	23047	21385	22200	31700	23500	19400	--	--
Zmhp003514	301.07	286.05	300.063	C16H12O6	[M+H]+	6,7,8-Tetrahydroxy-5-methoxyflavone	Flavonoids	Flavonoid	-	B	3555.4	3371	3463.2	7385.2	9319.8	8350	2690	3970	3790	--	--
mws0058	299.06	284	300.063	C16H12O6	[M-H]-	Diosmetin	Flavonoids	Flavonoid	520-34-3	B	12572	11220	11896	25416	33695	29600	14800	16000	15500	--	--
Zmxn001997	299.08	137.02	300.084	C13H16O8	[M-H]-	salicylic acid O-glycoside	Phenolic acids	Phenolic acids	-	A	4956500	5249800	5103150	805530	807320	806000	2460000	2360000	2400000	--	--
mws2367	299.11	119	300.121	C14H20O7	[M-H]-	Salidroside	Phenolic acids	Phenolic acids	10338-51-9	B	37398	44333	40865.5	20526	19337	19900	52900	45500	42000	C06046	ko00350,ko01100
Lmqn008288	299.26	299.26	300.267	C18H36O3	[M-H]-	3-hydroxy-stearic acid	Lipids	Free fatty acids	17773-30-7	B	282280	232560	257420	337040	282440	310000	349000	249000	254000	--	--
pme2954	303.05	137.02	302.043	C15H10O7	[M+H]+	Quercetin	Flavonoids	Flavonols	117-39-5	A	131970	209750	170860	83710	80221	82000	74500	69800	79800	C00389	ko00941,ko00944,ko01100,ko01110
mws1375	304.15	185.09	303.143	C12H21N3O6	[M+H]+	Nicotianamine	Amino acids and derivatives	Amino acids and derivatives	34441-14-0	B	127550	88717	108134	261410	308580	285000	78800	102000	81800	--	--
mws0044	303.05	125.02	304.058	C15H12O7	[M-H]-	Dihydroquercetin(Taxifolin)	Flavonoids	Dihydroflavonol	480-18-2	A	239960	275420	257690	294940	335830	315000	298000	297000	342000	C01617	ko00941,ko01100,ko01110
mws0042	305.07	125	306.074	C15H14O7	[M-H]-	Epigallocatechin	Flavonoids	Flavanols	970-74-1	B	39161	44370	41765.5	852760	915350	884000	102000	90100	88100	C12136	ko00941,ko01110
pme1086	306.08	143	307.084	C10H17N3O6S	[M-H]-	Glutathione reduced form	Amino acids and derivatives	Amino acids and derivatives	70-18-8	A	73229	75266	74247.5	9	9	9	90500	106000	89400	C00051	ko00270,ko00480,ko01100,ko02010
pmn001610	307.26	307.3	308.272	C20H36O2	[M-H]-	Eicosadienoic acid	Lipids	Free fatty acids	5598-38-9	A	163230	145150	154190	307540	329980	319000	237000	187000	177000	C16525	ko01040
Lmhn003074	309.06	193.05	310.069	C14H14O8	[M-H]-	feruloylmalic acid	Phenolic acids	Phenolic acids	-	B	139550	217200	178375	9	9	9	85700	82600	88600	--	--
pme3967	312.13	180	311.123	C12H17N5O5	[M+H]+	2-(Dimethylamino)guanosine	Nucleotides and derivatives	Nucleotides and derivatives	2140-67-2	B	54137	76022	65079.5	64236	65868	65100	39500	48900	45600	--	--
pmp000106	313.11	298.1	312.1	C18H16O5	[M+H]+	5,7,4'-Trimethoxyflavone	Flavonoids	Flavonoid	5631-70-9	B	27458	32086	29772	21091	18595	19800	26100	23300	19300	--	--
Rfmb087	311.22	293.21	312.23	C18H32O4	[M-H]-	13-Oxo-9-hydroxy-10-octadecenoic acid	Lipids	Free fatty acids	-	B	15378	12237	13807.5	48925	55950	52400	22800	22400	20900	--	--
pmn001689	311.22	223.17	312.23	C18H32O4	[M-H]-	9-Hydroxy-12-oxo-10-octadecenoic acid	Lipids	Free fatty acids	-	B	5533.9	8274	6903.95	5951.2	6286	6120	4480	4770	4990	--	--
pmn001571	313.11	298.08	314.115	C18H18O5	[M-H]-	Agrimonolide	Phenolic acids	Phenolic acids	21499-24-1	B	3929.4	4328.7	4129.05	6367.9	7758.6	7060	4260	4010	4780	--	--
Rfmb089	313.24	295.23	314.246	C18H34O4	[M-H]-	9,10-Dihydroxy-12-octadecenoic acid	Lipids	Free fatty acids	263399-34-4	B	462730	525820	494275	411270	469840	441000	264000	261000	245000	--	--
mws0988	315.05	165	316.058	C16H12O7	[M-H]-	Rhamnetin(7-O-Methxyl Quercetin)	Flavonoids	Flavonols	90-19-7	A	371270	1079200	725235	2181900	2811200	2500000	791000	815000	798000	C10176	--
pmn001367	315.07	153.02	316.079	C13H16O9	[M-H]-	Protocatechuic acid-4-glucoside	Phenolic acids	Phenolic acids	-	A	2943700	4819600	3881650	4768300	5309700	5040000	3220000	2890000	2900000	--	--
Hmtn001120	315.11	153.06	316.116	C14H20O8	[M-H]-	5-(2-Hydroxyethyl)-2-O-glucosylohenol	Phenolic acids	Phenolic acids	-	A	2959700	2852400	2906050	153560	196590	175000	1170000	1150000	1150000	--	--
mws0582	322.11	130	321.099	C11H19N3O6S	[M+H]+	S-(methyl)glutathione	Amino acids and derivatives	Amino acids and derivatives	2922-56-7	B	6019.1	2873.7	4446.4	34859	28382	31600	303000	253000	322000	C11347	--
mws0983	326.31	62.06	325.298	C20H39NO2	[M+H]+	N-Oleoylethanolamine	Others	Others	111-58-0	B	6248.9	7492.4	6870.65	16418	16007	16200	6870	5500	6310	C20792	--
Zmhn002301	325.09	163.04	326.1	C15H18O8	[M-H]-	p-Coumaric acid-O-glycoside	Phenolic acids	Phenolic acids	-	A	23087000	24417000	23752000	22926000	22365000	22600000	14100000	13000000	13700000	--	--
pmn001690	327.14	165.09	328.152	C16H24O7	[M-H]-	3-Hydroxy-4-isopropylbenzylalcohol 3-glucoside	Phenolic acids	Phenolic acids	-	B	249990	251810	250900	195370	224270	210000	126000	120000	154000	--	--
mws0884	328.05	134.2	329.053	C10H12N5O6P	[M-H]-	Cyclic AMP	Nucleotides and derivatives	Nucleotides and derivatives	60-92-4	B	74607	75004	74805.5	47984	45832	46900	29800	36000	35500	C00575	ko00230,ko01100
Lmtn002565	329.11	167.03	330.095	C14H18O9	[M-H]-	1'-O-vanilloyl-β-D-glucoside	Phenolic acids	Phenolic acids	-	A	19277000	20914000	20095500	24887000	23913000	24400000	18700000	18700000	17800000	--	--
pmn001517	329.12	167	330.131	C15H22O8	[M-H]-	3,4,5-Trimethoxyphenyl-β-D-Glucopyranoside	Phenolic acids	Phenolic acids	-	B	3270200	3406700	3338450	3118400	3769500	3440000	10500000	10100000	10700000	--	--
pmn001694	329.23	229.15	330.241	C18H34O5	[M-H]-	9,10,13-Trihyroxy-11-octadecadienoic acid	Lipids	Free fatty acids	-	A	20932	24630	22781	462100	476130	469000	165000	162000	158000	--	--
pmp001284	331.28	313.27	330.277	C19H38O4	[M+H]+	Monopalmitin	Lipids	Glycerol ester	542-44-9	B	8863.5	5843.5	7353.5	6269.9	7519	6890	6350	7070	7280	--	--
pme3184	332.08	136	331.068	C10H14N5O6P	[M+H]+	2'-Deoxyadenosine-5'-monophosphate	Nucleotides and derivatives	Nucleotides and derivatives	653-63-4	B	857930	1270200	1064065	38841	25109	32000	125000	156000	173000	C00360	ko00230,ko01100
Lmfn000604	331.07	169.01	332.074	C13H16O10	[M-H]-	6-O-Galloyl-β-D-glucose	Tannins	Tannin	13186-19-1	B	2333700	3028200	2680950	1009200	1019000	1010000	2250000	2250000	2150000	--	--
pmn001518	331.07	169.01	332.074	C13H16O10	[M-H]-	1-O-Galloyl-β-D-glucose	Phenolic acids	Phenolic acids	58511-73-2	B	1930700	2109100	2019900	2884600	3241200	3060000	3670000	3440000	3440000	--	--
HmLn000659	331.07	169.01	332.075	C13H16O10	[M-H]-	3-O-Galloyl-β-D-glucose	Tannins	Tannin	-	B	2284700	2780100	2532400	1083100	1078900	1080000	2290000	2290000	2360000	--	--
HmLn000873	331.07	169.01	332.075	C13H16O10	[M-H]-	2-O-Galloyl-β-D-glucose	Tannins	Tannin	-	B	2634300	3374500	3004400	370500	527930	449000	1030000	1080000	1360000	--	--
mws0675	335.06	123	334.057	C11H15N2O8P	[M+H]+	β-Nicotinamide mononucleotide	Nucleotides and derivatives	Nucleotides and derivatives	1094-61-7	B	244150	213570	228860	178320	244470	211000	134000	106000	160000	C00455	ko00760,ko01100
Hmln002806	335.08	179.03	336.085	C16H16O8	[M-H]-	3-O-Caffeoylshikimic acid	Phenolic acids	Phenolic acids	180981-12-8	A	213970	243640	228805	1742800	2102800	1920000	645000	608000	742000	--	--
pmp000232	339.11	147.04	338.1	C16H18O8	[M+H]+	Cis-3-p-coumaric quinic acid	Phenolic acids	Phenolic acids	1899-30-5	A	1916500	1822200	1869350	773980	805790	790000	262000	277000	258000	--	--
mws1015	339.07	177	340.079	C15H16O9	[M-H]-	Esculin(6,7-DihydroxyCoumarin-6-glucoside)	Lignans and Coumarins	Coumarins	531-75-9	A	3076900	3574800	3325850	264400	284400	274000	1030000	1020000	952000	C09264	--
pmn001420	341.09	179.04	342.095	C15H18O9	[M-H]-	1-O-[(E)-Caffeoyl]-β-D-glucopyranose	Phenolic acids	Phenolic acids	-	A	10876000	9918200	10397100	6578100	7047500	6810000	1410000	1430000	1270000	--	--
Lmcp007240	343.12	313.08	342.11	C19H18O6	[M+H]+	5,7,8,4'-Tetramethoxyflavone	Flavonoids	Flavonoid	6601-66-7	B	703.87	496.13	600	1507.3	1361.7	1430	86000	81900	83400	--	--
mws5038	341.11	89.02	342.116	C12H22O11	[M-H]-	Isomaltulose*	Others	Saccharides and Alcohols	13718-94-0	A	931840	1089600	1010720	725420	643710	685000	826000	1260000	838000	--	--
mws1080	341.11	179	342.116	C12H22O11	[M-H]-	Galactinol*	Others	Saccharides and Alcohols	3687-64-7	A	3708700	4085800	3897250	2469000	2588300	2530000	3840000	4060000	4340000	--	--
mws0264	341.11	119	342.116	C12H22O11	[M-H]-	D-(+)-TrehaloseAnhydrous*	Others	Saccharides and Alcohols	99-20-7	A	615240	541050	578145	521800	609040	565000	741000	924000	810000	C01083	ko00500,ko01100,ko01110,ko02010
pme0519	341.11	119	342.116	C12H22O11	[M-H]-	D-(+)-Sucrose*	Others	Saccharides and Alcohols	57-50-1	A	1997800	2298200	2148000	1462200	1570900	1520000	2240000	2420000	2400000	C00089	ko00052,ko00500,ko01100,ko01110,ko02010
mws1333	341.11	113	342.116	C12H22O11	[M-H]-	Melibiose*	Others	Saccharides and Alcohols	585-99-9	A	561920	762190	662055	450250	528170	489000	680000	578000	666000	C05402	ko00052,ko01100,ko02010
mws0906	341.12	179	342.131	C16H22O8	[M-H]-	Coniferin	Phenolic acids	Phenolic acids	531-29-3	B	10014000	10794000	10404000	4806100	4923600	4860000	4910000	4600000	4700000	C00761	ko00940
pmb2211	343.3	240.7	342.288	C19H38N2O3	[M+H]+	Cocamidopropyl betaine	Alkaloids	Alkaloids	4292/10/8	A	7032.9	5353.4	6193.15	5664.5	5137.6	5400	5100	4730	4570	--	--
Zmln000899	343.11	181.05	344.111	C15H20O9	[M-H]-	Syringic Aldehyde-glucoside	Phenolic acids	Phenolic acids	-	A	3329000	3385300	3357150	43492	60671	52100	923000	1060000	1030000	--	--
pmb0801	346.11	184.1	345.106	C14H19NO9	[M+H]+	4-Pyridoxic acid O-hexoside	Others	Vitamin	-	B	25461	32890	29175.5	2032.3	5223.7	3630	10300	8810	9770	--	--
Lmtn000940	345.08	139.04	346.09	C14H18O10	[M-H]-	1-O-(3,4-dihydroxy-5-methoxy-benzoyl)-β-D-glucoside	Phenolic acids	Phenolic acids	-	B	2038700	2316700	2177700	42652	44939	43800	877000	791000	856000	--	--
pmb0981	348.07	136	347.063	C10H14N5O7P	[M+H]+	Adenosine 5'-monophosphate	Nucleotides and derivatives	Nucleotides and derivatives	61-19-8	B	187780	173700	180740	273460	337850	306000	94900	73600	92000	C00020	ko00230,ko00908,ko01100,ko01110
pmb2444	353.27	261.3	352.261	C21H36O4	[M+H]+	MAG(18:3)isomer1	Lipids	Glycerol ester	-	A	4603100	4323400	4463250	4660100	4775400	4720000	3140000	2820000	2920000	--	--
mws0178	353.09	191.01	354.095	C16H18O9	[M-H]-	Chlorogenic acid	Phenolic acids	Phenolic acids	327-97-9	A	1331600	1440300	1385950	474050	476800	475000	8530000	8030000	7780000	C00852	ko00940,ko00941,ko00945,ko01110
pmp000545	355.1	337.12	354.095	C16H18O9	[M+H]+	4-Caffeoylquinic acid	Phenolic acids	Phenolic acids	905-99-7	A	86601	103810	95205.5	36177	39307	37700	639000	611000	639000	--	--
mws1077	355.1	193.05	354.095	C16H18O9	[M+H]+	Scopolin	Lignans and Coumarins	Coumarins	531-44-2	A	83970	79127	81548.5	35127	30393	32800	118000	131000	124000	C01527	ko00940,ko01110
pmb0890	355.28	263.3	354.277	C21H38O4	[M+H]+	MAG(18:2)	Lipids	Glycerol ester	-	A	1247500	1329200	1288350	841210	832060	837000	823000	716000	821000	--	--
Lmhn001580	355.07	223.06	356.074	C15H16O10	[M-H]-	sinapoyltartaric acid	Phenolic acids	Phenolic acids	-	B	9770.1	11124	10447	2243.2	3036.5	2640	5180	6350	7060	--	--
Zmhn002422	355.1	193.05	356.11	C16H20O9	[M-H]-	Feruloyl glucose	Phenolic acids	Phenolic acids	-	B	2358500	2603500	2481000	694840	718860	707000	787000	690000	809000	C17759	--
pmb0296	357.3	265.4	356.293	C21H40O4	[M+H]+	MAG(18:1)isomer2	Lipids	Glycerol ester	-	B	71769	70158	70963.5	93422	77563	85500	44000	48100	52300	--	--
pmb2363	357.3	265.3	356.293	C21H40O4	[M+H]+	MAG(18:1)isomer1	Lipids	Glycerol ester	-	B	58589	69119	63854	74116	66397	70300	40100	43500	46200	--	--
mws1526	359.13	197	358.126	C16H22O9	[M+H]+	Sweroside	Terpenoids	Sesquiterpenoids	14215-86-2	B	785990	874360	830175	60847	83337	72100	258000	284000	309000	C17071	--
Lmdn004267	357.13	151.04	358.142	C20H22O6	[M-H]-	Epipinoresinol	Lignans and Coumarins	Lignans	24404-50-0	B	101410	103850	102630	132610	154150	143000	85400	93200	87600	--	--
mws0097	357.13	151	358.142	C20H22O6	[M-H]-	Pinoresinol	Lignans and Coumarins	Lignans	487-36-5	B	103000	100250	101625	151690	162470	157000	96700	89600	90900	C05366	ko00998,ko01110
pmb3107	359.1	182.1	360.106	C15H20O10	[M-H]-	Glucosyringic Acid	Phenolic acids	Phenolic acids	-	A	832410	833020	832715	263980	304070	284000	1020000	1040000	965000	--	--
Zmxp005324	361.16	189.09	360.157	C20H24O6	[M+H]+	(7R，8S)-dihydrodehydrodiconiferyl alcohol	Lignans and Coumarins	Lignans	126253-41-6	B	158490	175610	167050	69589	68344	69000	118000	110000	121000	--	--
pmb0998	364.07	152.1	363.058	C10H14N5O8P	[M+H]+	Guanosine 5'-monophosphate	Nucleotides and derivatives	Nucleotides and derivatives	85-32-5	B	3342.3	4167.8	3755.05	9916.5	10325	10100	4910	5610	6470	C00144	ko00230,ko01100
Lmgp003270	369.16	177.06	368.074	C16H16O10	[M+H]+	Scopoletin??Beta-D-Glucuronide	Lignans and Coumarins	Coumarins	132752-65-9	A	1154700	1391000	1272850	329010	334430	332000	965000	986000	903000	--	--
pmb0752	369.12	177.1	368.111	C17H20O9	[M+H]+	3-O-Feruloyl quinic acid	Phenolic acids	Phenolic acids	1899-29-2	A	180170	242300	211235	33126	10366	21700	51800	69500	57300	C02572	--
mws0179	367.1	190.9	368.111	C17H20O9	[M-H]-	Chlorogenic acid methyl ester	Phenolic acids	Phenolic acids	29708-87-0	B	1228100	1304000	1266050	474980	478600	477000	848000	1060000	997000	--	--
Lmbp002255	371.1	209.05	370.09	C16H18O10	[M+H]+	Fraxin	Lignans and Coumarins	Coumarins	524-30-1	B	8560.1	12454	10507	5017.5	4478.9	4750	7440	5350	8630	--	--
pmn001695	371.1	249.06	372.106	C16H20O10	[M-H]-	Trihydroxycinnamoylquinic acid	Phenolic acids	Phenolic acids	-	A	891250	887440	889345	2920100	2944400	2930000	789000	979000	925000	--	--
mws0055	373.13	343	372.121	C20H20O7	[M+H]+	Tangeretin	Flavonoids	Flavonols	481-53-8	A	17593	7821.6	12707.3	27416	25095	26300	885000	878000	903000	C10190	--
mws0011	371.13	209	372.142	C17H24O9	[M-H]-	Syringin	Phenolic acids	Phenolic acids	118-34-3	B	9	9	9	520770	506720	514000	152000	140000	196000	C01533	ko00940
mws0232	377.15	243	376.138	C17H20N4O6	[M+H]+	Riboflavin	Others	Vitamin	83-88-5	A	786520	961360	873940	1973600	1892600	1930000	617000	762000	854000	C00255	ko00740,ko01100,ko01110,ko02010
pme3337	384.12	252	383.108	C14H17N5O8	[M+H]+	N6-Succinyl Adenosine	Nucleotides and derivatives	Nucleotides and derivatives	4542-23-8	A	207340	247060	227200	707850	800410	754000	396000	405000	477000	--	--
pmb3062	385.1	151.1	386.102	C17H22O10	[M-H]-	Eudesmoyl quinic acid	Phenolic acids	Phenolic acids	-	B	148280	140950	144615	14413	14326	14400	47900	52800	54900	--	--
pmb2940	385.11	205	386.121	C17H22O10	[M-H]-	1-O-β-D-Glucopyranosyl sinapate	Phenolic acids	Phenolic acids	78185-48-5	B	2685400	2844400	2764900	3005300	3565400	3290000	1860000	1950000	1860000	--	--
pmn001423	385.19	223.13	386.194	C19H30O8	[M-H]-	Roseoside	Others	Others	54835-70-0	A	1681200	2113400	1897300	405460	398080	402000	563000	586000	611000	--	--
mws0043	403.14	373.1	402.131	C21H22O8	[M+H]+	Nobiletin	Flavonoids	Flavonoid	478-01-3	A	38868	18592	28730	57321	51263	54300	2150000	2090000	2070000	C10112	--
Cmjn004337	401.14	269.1	402.153	C18H26O10	[M-H]-	Benzyl-O-β-D-glucopyranose-β-D-xyranoside	Others	Others	-	A	839350	1389700	1114525	1378300	1251200	1310000	865000	822000	595000	--	--
pme3007	402.99	159	404.002	C9H14N2O12P2	[M-H]-	Uridine 5'-diphosphate	Nucleotides and derivatives	Nucleotides and derivatives	27821-45-0	B	8707.8	10296	9501.9	6828.1	6443.3	6640	9960	11700	10500	C00015	ko00240,ko00908,ko01100
Hmgp003664	417.12	381.1	416.11	C21H20O9	[M+H]+	Apigenin-C-rhamnoside	Flavonoids	Flavonoid	-	B	13686	10465	12075.5	9	9	9	11500	5170	8540	--	--
Lmyp005841	417.12	255.06	416.111	C21H20O9	[M+H]+	Chrysin-7-glucoside	Flavonoids	Flavonoid	-	A	45596000	47455000	46525500	17832000	17571000	17700000	27600000	29900000	30400000	--	--
pmp000417	417.12	255.06	416.111	C21H20O9	[M+H]+	Daidzein-4'-glucoside	Flavonoids	Isoflavones	-	B	313210	197130	255170	42940	61497	52200	212000	105000	158000	--	--
Lmbp003668	419.1	287.05	418.09	C20H18O10	[M+H]+	Kaempferol-3-arabinopyranoside	Flavonoids	Flavonoid	-	A	6862400	8014000	7438200	3126400	3332600	3230000	3600000	3560000	3940000	--	--
pmp000383	419.13	257.08	418.126	C21H22O9	[M+H]+	Liquiritin	Flavonoids	Dihydroflavone	551-15-5	B	914170	844900	879535	801700	808890	805000	1030000	977000	828000	C16989	--
Lmyp004617	419.13	257.08	418.127	C21H22O9	[M+H]+	Pinocembrin 7-O-β-D-glucoside(Pinocembroside)	Flavonoids	Flavonoid	75829-43-5	A	2834200	2823500	2828850	995010	959820	977000	1110000	1190000	1200000	--	--
pmn001663	417.16	402.1	418.163	C22H26O8	[M-H]-	Syringaresinol	Lignans and Coumarins	Lignans	21453-69-0	B	160000	172640	166320	9267.2	9242.2	9250	74100	69800	74400	C10889	--
Hmcp005697	425.37	191.18	424.37	C30H48O	[M+H]+	δ-Amyrenone	Terpenoids	Triterpene	-	B	275250	303350	289300	9	4369.5	2190	141000	121000	129000	--	--
pmb0864	426.26	285.24	425.254	C19H40NO7P	[M+H]+	LysoPE 14:0	Lipids	LPE	-	B	4860.6	5886.2	5373.4	14850	12409	13600	4940	7360	6630	--	--
mws0048	431.1	311	432.106	C21H20O10	[M-H]-	Apigenin-8-C-Glucoside (Vitexin)	Flavonoids	Flavonoid carbonoside	3681-93-4	B	3888.5	6050.2	4969.35	21075	13800	17400	17600	21200	26400	C01460	ko00941,ko00944
pme0321	431.1	285	432.106	C21H20O10	[M-H]-	Kaempferol-7-O-rhamnoside	Flavonoids	Flavonols	20196-89-8	B	106100	136760	121430	13925	9710.8	11800	64400	51500	63700	--	--
mws0072	433.11	271.01	432.106	C21H20O10	[M+H]+	Apigenin 5-O-glucoside	Flavonoids	Flavonoid	28757-27-9	A	11908000	12416000	12162000	283590	358610	321000	6530000	6890000	7220000	--	--
Lmgp004731	433.11	271.06	432.106	C21H20O10	[M+H]+	5,7,4'-trihydroxy isoflavone-7-O-galactoside	Flavonoids	Isoflavones	-	A	344170	448460	396315	92077	129540	111000	365000	439000	499000	--	--
mws0919	431.1	285	432.106	C21H20O10	[M-H]-	Kaempferol-3-O-rhamnoside (Afzelin)(Kaempferin)	Flavonoids	Flavonols	482-39-3	B	130790	138690	134740	9	9	9	59000	69800	49300	C16911	ko00944
pmp000117	433.15	418.1	432.142	C22H24O9	[M+H]+	3,5,6,7,8,3',4'-Heptamethoxyflavone	Flavonoids	Flavonols	1178-24-1	B	23671	2976.8	13323.9	5638.4	4644.5	5140	47300	46900	40100	--	--
pme3392	433.11	271.06	433.113	C21H21O10+	[M]+	Pelargonidin-3-O-glucoside	Flavonoids	Anthocyanins	47684-27-5	B	52818	53620	53219	37588	43973	40800	27300	28600	38500	C12137	ko00942,ko01100,ko01110
mws2186	435.09	303	434.085	C20H18O11	[M+H]+	Avicularin	Flavonoids	Flavonols	572-30-5	A	58176000	62675000	60425500	22609000	24669000	23600000	28100000	30900000	30700000	--	--
mws1179	433.11	271	434.121	C21H22O10	[M-H]-	Naringenin-7-O-glucoside	Flavonoids	Dihydroflavone	529-55-5	A	2237300	2153600	2195450	523820	584690	554000	1150000	1440000	1410000	--	--
Cmzn005251	433.11	271.06	434.121	C21H22O10	[M-H]-	6-O-Caffeoylarbutin	Phenolic acids	Phenolic acids	136172-60-6	A	4614300	4131700	4373000	7311100	7786900	7550000	6440000	6530000	6600000	--	--
pme1611	433.11	313	434.121	C21H22O10	[M-H]-	Isohemiphloin	Flavonoids	Flavonoid carbonoside	3682/2/8	B	307170	323750	315460	108470	86550	97500	182000	191000	150000	--	--
HJN055	435.13	273.08	436.136	C21H24O10	[M-H]-	Dihydrocharcone-4`-O-β-Dglucopyranoside	Others	Others	-	A	3064000	4099200	3581600	4830200	4900800	4870000	4520000	2050000	3770000	--	--
mws2118	435.13	166.7	436.137	C21H24O10	[M-H]-	Phlorizin	Flavonoids	Chalcones	60-81-1	A	6555300	7042100	6798700	7471400	7419800	7450000	5980000	4750000	4980000	C01604	ko00941,ko01110
mws1397	441.08	169	442.09	C22H18O10	[M-H]-	Epicatechin gallate	Flavonoids	Flavanols	1257-08-5	B	74602	87875	81238.5	36372	45321	40800	30900	29700	33500	--	--
pme3400	447.13	285	446.121	C22H22O10	[M+H]+	Sissotrin	Flavonoids	Isoflavones	5928-26-7	B	1770	2487.2	2128.6	4460.5	10910	7690	10700	9650	7710	C05376	ko00943
Hmpp003270	449.1	287.05	448.091	C21H20O11	[M+H]+	Luteolin-4'-O-β-D-glucoside*	Flavonoids	Flavonoid	6920-38-3	A	27308000	35391000	31349500	21712000	21822000	21800000	19400000	19700000	18600000	--	--
Hmcp002316	449.11	317.06	448.1	C21H20O11	[M+H]+	Isorhamnetin-3-O-arabinoside	Flavonoids	Flavonols	-	B	227460	283220	255340	378450	409680	394000	210000	186000	196000	--	--
mws0045	449.11	303.05	448.101	C21H20O11	[M+H]+	Quercetin-3-O-α-L-rhamnoside(Quercitrin )	Flavonoids	Flavonols	522-12-3	B	3017500	3125700	3071600	310900	305000	308000	2010000	2160000	2060000	C01750	ko00944
mws2209	449.11	287.06	448.101	C21H20O11	[M+H]+	Kaempferol-3-O-glucoside (Astragalin)*	Flavonoids	Flavonols	480-10-4	A	25014000	25335000	25174500	16954000	19556000	18300000	14600000	16300000	15900000	C12249	ko00944,ko01110
mws1361	449.11	151	450.116	C21H22O11	[M-H]-	Astilbin	Flavonoids	Dihydroflavonol	29838-67-3	B	28951000	25223000	27087000	39771000	40253000	40000000	28900000	30900000	30300000	C17449	--
pmb3023	449.11	287	450.116	C21H22O11	[M-H]-	Eriodictyol C-hexoside	Flavonoids	Dihydroflavone	-	B	2194500	2091100	2142800	7598200	7178500	7390000	2590000	3240000	3050000	--	--
Lmtn002796	449.1	287.05	450.116	C21H22O11	[M-H]-	Aromadendrin 7-glucoside	Terpenoids	Triterpene Saponin	-	B	3666000	4660900	4163450	5213300	5769700	5490000	4620000	4400000	4280000	--	--
Lmmn004625	449.11	287.06	450.116	C21H22O11	[M-H]-	Dihydrokaempferol-7-O-glucoside	Flavonoids	Flavonols	-	A	20514000	20934000	20724000	5998000	6195100	6100000	10500000	9950000	11800000	--	--
pmn001417	451.1	341.06	452.111	C24H20O9	[M-H]-	Cinchonain Ic	Flavonoids	Flavanols	85081-22-7	A	663590	777380	720485	8704.7	5168.1	6940	11000000	11500000	12200000	--	--
pmn001415	451.1	341.06	452.111	C24H20O9	[M-H]-	Catechin-(7,8-bc)-4β-(3,4-dihydroxyphenyl)-dihydro-2-(3H)-pyranone	Flavonoids	Flavanols	-	A	266860	247790	257325	9	9	9	5630000	5660000	5500000	--	--
HJN041	451.12	289.07	452.131	C21H24O11	[M-H]-	Epicatechin glucoside	Flavonoids	Flavonoid	-	A	281340	300410	290875	10844	8507.7	9680	439000	421000	397000	--	--
Hmpn005101	451.12	289.07	452.131	C21H24O11	[M-H]-	Sieboldin	Flavonoids	Flavonoid	18777-73-6	A	9550500	11066000	10308250	10677000	12019000	11300000	9970000	8180000	8860000	--	--
pmd0160	454.29	313.27	453.286	C21H44NO7P	[M+H]+	LysoPE 16:0(2n isomer)	Lipids	LPE	-	A	42178	46757	44467.5	55688	53822	54800	18300	20600	20600	--	--
pmb0876	454.29	313.27	453.286	C21H44NO7P	[M+H]+	LysoPE 16:0	Lipids	LPE	53862-35-4	A	934850	938070	936460	2421500	2368300	2390000	869000	855000	904000	--	--
Wmlp007992	455.35	409.34	454.34	C30H46O3	[M+H]+	Betulonic acid	Terpenoids	Triterpene	4481-62-3	A	974740	1080700	1027720	692520	575750	634000	710000	578000	786000	--	--
pmp000263	455.35	409.35	454.345	C30H46O3	[M+H]+	Sanguisorbigenin	Terpenoids	Triterpene	-	A	180390	228640	204515	7244.2	10510	8880	102000	90300	86400	--	--
mws4053	455.35	455.36	456.36	C30H48O3	[M-H]-	Ursolic acid	Terpenoids	Triterpene	77-52-1	B	6171500	4989700	5580600	1628200	2764700	2200000	4880000	3870000	3890000	C08988	--
pmn001700	455.35	455.35	456.36	C30H48O3	[M-H]-	24,30-Dihydroxy-12(13)-enolupinol	Terpenoids	Triterpene	-	A	10815000	10414000	10614500	5609000	7565600	6590000	8980000	4950000	7400000	--	--
mws0034	457.08	169	458.085	C22H18O11	[M-H]-	Epigallocatechin gallate	Tannins	Tannin	989-51-5	B	14373	5925.2	10149.1	2712.6	4311.8	3510	1160000	1030000	924000	C09731	--
mad2085	457.08	295.04	458.085	C22H18O11	[M-H]-	Caffeoyl-p-coumaroyltartaric acid	Phenolic acids	Phenolic acids	-	B	51648	55466	53557	36054	58584	47300	59200	39300	36000	--	--
Lmzn001894	461.07	285.04	462.08	C21H18O12	[M-H]-	Kaempferol-3-O-β-D-glucuronide	Flavonoids	Flavonols	-	B	308820	335040	321930	165790	160500	163000	173000	213000	163000	--	--
Lmpn006208	461.11	315.05	462.116	C22H22O11	[M-H]-	8-methoxykaempferol-7-O-rhamnoside	Flavonoids	Flavonols	-	B	32255	25256	28755.5	7537.8	8107.9	7820	25000	19900	16700	--	--
pmp000579	463.12	301.07	462.116	C22H22O11	[M+H]+	Diosmetin-7-O-galactoside	Flavonoids	Flavonoid	-	A	243960	213390	228675	61708	72408	67100	716000	805000	689000	--	--
pmn001561	461.11	149.1	462.116	C22H22O11	[M-H]-	Cimicifugic acid J/N	Phenolic acids	Phenolic acids	-	B	16864	27350	22107	17875	22680	20300	17400	30200	23300	--	--
Zmhn003191	461.11	341.06	462.116	C22H22O11	[M-H]-	Isoscoparin	Flavonoids	Flavonoid	20013-23-4	B	1456000	1614700	1535350	635440	697230	666000	978000	805000	751000	C05990	--
pmb2999	461.11	299.1	462.116	C22H22O11	[M-H]-	Chrysoeriol-5-O-hexoside	Flavonoids	Flavonoid	-	B	52996000	47624000	50310000	18570000	22890000	20700000	30100000	26500000	29300000	--	--
pmn001468	461.13	137	462.137	C19H26O13	[M-H]-	Sibiricose A3	Phenolic acids	Phenolic acids	139726-39-9	B	117030	107780	112405	6962.5	16902	11900	19600	27900	30100	--	--
mws0091	463.09	300.03	464.095	C21H20O12	[M-H]-	Quercetin-3-O-β-D-glucoside(Isoquercitrin)*	Flavonoids	Flavonols	482-35-9	A	16160000	17984000	17072000	7086400	5638300	6360000	11100000	11000000	14100000	C05623	ko00944,ko01100,ko01110
mws0061	463.09	300	464.095	C21H20O12	[M-H]-	Quercetin-3-O-β-D-Galactoside (Hyperin)*	Flavonoids	Flavonols	482-36-0	A	13704000	17729000	15716500	6231900	5861700	6050000	13100000	10900000	12900000	C10073	--
pme1598	463.12	301	464.132	C22H24O11	[M-H]-	Hesperetin 5-O-glucoside	Flavonoids	Dihydroflavonol	69651-80-5	B	2097500	2373500	2235500	842170	785930	814000	1630000	1430000	1710000	--	--
Xmsn002700	465.13	303.06	466.111	C21H22O12	[M-H]-	Taxifolin-3'-O-β-D-glucoside	Flavonoids	Flavonoid	-	B	4602600	5157500	4880050	2075200	2160900	2120000	4500000	3500000	3490000	--	--
pmd0130	468.31	184.07	467.301	C22H46NO7P	[M+H]+	LysoPC 14:0(2n isomer)	Lipids	LPC	-	B	2551.2	2644.1	2597.65	4766.4	5375.7	5070	2280	2760	2080	--	--
Hmmp002121	469.12	317.08	468.113	C23H16O11	[M+H]+	Isorhamnetin-O-gallate	Flavonoids	Flavonols	-	B	97824	93106	95465	17042	19045	18000	43900	48000	66800	--	--
pmn001704	469.33	423.33	470.34	C30H46O4	[M-H]-	2,3-Dihydroxy 5(6),12(13)diene ursolic acid	Terpenoids	Triterpene	-	B	186110	202920	194515	25725	23912	24800	199000	175000	194000	--	--
Hmjn008136	469.33	469.33	470.34	C30H46O4	[M-H]-	Camaldulenic acid	Terpenoids	Triterpene	71850-15-2	B	4083800	4364700	4224250	589590	581720	586000	4350000	4120000	4290000	--	--
Hmpn009573	471.35	453.33	472.354	C30H48O4	[M-H]-	Corosolic acid	Terpenoids	Triterpene	4547-24-4	A	1224600	1176000	1200300	1233100	1297400	1270000	1320000	1250000	1280000	--	--
pmp000266	473.36	207.17	472.355	C30H48O4	[M+H]+	3β,19α-Dihydroxyolean-12-en-28-oic acid	Terpenoids	Triterpene	-	B	10866	12576	11721	9	9	9	20100	20200	20600	--	--
mws1610	471.35	471.35	472.355	C30H48O4	[M-H]-	Maslinic acid	Terpenoids	Triterpene	4373-41-5	A	10073000	9802400	9937700	5783100	5702600	5740000	10500000	10200000	10200000	C16939	--
pmb1912	474.17	327	473.166	C20H23N7O7	[M+H]+	10-Formyl-THF	Alkaloids	Alkaloids	2800-34-2	A	14246	12066	13156	556350	503130	530000	229000	244000	239000	C00234	ko00670,ko00970,ko01100,ko01200
pmn001572	475.16	313.1	476.145	C24H28O10	[M-H]-	Agrimonolide-6-O-β-D-glucopyranoside	Phenolic acids	Phenolic acids	126223-29-8	B	178860	175410	177135	90625	108020	99300	81800	79300	81400	--	--
pmb0545	477.14	315.09	477.14	C23H25O11+	[M]+	Rosinidin O-hexoside	Flavonoids	Anthocyanins	-	B	140220	126580	133400	104390	91235	97800	53900	78900	64400	--	--
pmb0881	478.29	337.27	477.286	C23H44NO7P	[M+H]+	LysoPE 18:2	Lipids	LPE	-	B	766190	801670	783930	2126300	2250800	2190000	816000	814000	782000	--	--
pmb0874	478.29	337.27	477.286	C23H44NO7P	[M+H]+	LysoPE 18:2(2n isomer)	Lipids	LPE	-	A	5455000	5731000	5593000	10800000	11124000	11000000	7200000	7420000	7640000	--	--
Hmpp003242	479.11	317.06	478.101	C22H22O12	[M+H]+	Isorhamnetin-3-O-glucoside*	Flavonoids	Flavonols	-	A	6904000	7624900	7264450	21911000	24459000	23200000	7880000	8320000	7740000	--	--
HJAP063	479.12	317.07	478.111	C22H22O12	[M+H]+	Isorhamnetin-O-glucopyranoside*	Flavonoids	Flavonoid	-	A	193450	558710	376080	31960000	35417000	33700000	7160000	7440000	7660000	--	--
pmb0856	480.31	339.29	479.301	C23H46NO7P	[M+H]+	LysoPE 18:1(2n isomer)	Lipids	LPE	-	A	226270	249460	237865	706920	731330	719000	340000	318000	351000	--	--
pmb2260	480.31	184.07	479.301	C23H46NO7P	[M+H]+	LysoPC 15:1	Lipids	LPC	-	B	11117	11112	11114.5	31077	36127	33600	19200	18700	17400	--	--
mws0289	480.31	339.29	479.301	C23H46NO7P	[M+H]+	LysoPE 18:1	Lipids	LPE	89576-29-4	A	38443	43135	40789	396800	377890	387000	110000	107000	123000	--	--
Lmdp002969	481.1	319.06	480.09	C21H20O13	[M+H]+	Myricetin 3-O-galactoside	Flavonoids	Flavonols	15648-86-9	B	1788400	2280800	2034600	9	9	9	559000	714000	587000	--	--
pmb2319	482.32	184.07	481.317	C23H48NO7P	[M+H]+	LysoPC 15:0	Lipids	LPC	-	B	6645.3	6902.8	6774.05	3055.4	4873.7	3960	3440	3980	2590	--	--
Hmyn007168	483.27	255.23	484.278	C22H45O9P	[M-H]-	LysoPG(16:0)	Lipids	Glycerol ester	-	B	105460	141520	123490	150520	189760	170000	26700	13300	11600	--	--
pmn001707	485.33	485.33	486.335	C30H46O5	[M-H]-	Quillaic acid	Phenolic acids	Phenolic acids	631-01-6	B	9	9	9	107960	132820	120000	522000	631000	609000	C08972	--
Lmzn006109	485.33	467.32	486.335	C30H46O5	[M-H]-	2-oxo-pomolic acid	Terpenoids	Triterpene	-	A	3885800	3969300	3927550	1016600	1065800	1040000	4690000	4540000	4630000	--	--
pmp000268	487.34	405.31	486.335	C30H46O5	[M+H]+	Rosamultic acid	Terpenoids	Triterpene	14285-76-4	A	1228000	1268600	1248300	330310	363550	347000	1790000	1640000	1820000	--	--
Li512114	485.36	453.34	486.371	C31H50O4	[M-H]-	Ursolic acid-OCH3	Terpenoids	Triterpene	-	A	346020	339020	342520	21512	22382	21900	2490000	1870000	1920000	--	--
pmn001591	487.34	469.3	488.35	C30H48O5	[M-H]-	Rutundic acid	Terpenoids	Triterpene	20137-37-5	A	289630	246130	267880	32664	36615	34600	224000	216000	213000	--	--
pmn001426	487.34	469.23	488.35	C30H48O5	[M-H]-	Euscaphic acid	Terpenoids	Triterpene	53155-25-2	A	402930	471470	437200	97209	115560	106000	237000	223000	207000	C17890	--
Lmzn004190	487.35	469.33	488.35	C30H48O5	[M-H]-	Tormentic Acid	Terpenoids	Triterpene	13850-16-3	B	3553400	3421800	3487600	2159800	2349200	2250000	3760000	3450000	3630000	--	--
pmp000269	489.36	407.33	488.35	C30H48O5	[M+H]+	Arjunic Acid	Terpenoids	Triterpene	31298-06-3	A	660240	580130	620185	332250	318060	325000	423000	403000	467000	--	--
Zmhn003565	489.1	285.04	490.111	C23H22O12	[M-H]-	Kaempferol-3-O-(6''-acetyl)-glucoside	Flavonoids	Flavonols	-	A	1975600	1605500	1790550	6590700	8760400	7680000	6330000	3960000	5310000	--	--
pmb0863	492.31	184.07	491.301	C24H46NO7P	[M+H]+	LysoPC 16:2(2n isomer)	Lipids	LPC	-	B	37759	35998	36878.5	37929	38104	38000	61500	59600	60700	--	--
pmp001270	494.32	184.07	493.317	C24H48NO7P	[M+H]+	LysoPC 16:1	Lipids	LPC	-	B	13249	14658	13953.5	80181	114550	97400	22100	19800	21200	--	--
pmn001363	493.11	313.07	494.121	C26H22O10	[M-H]-	Salvianolic acid N	Phenolic acids	Phenolic acids	-	B	23780	23610	23695	3058.8	2511.5	2790	11300	13200	15200	--	--
pmd0132	496.34	184.07	495.332	C24H50NO7P	[M+H]+	LysoPC 16:0(2n isomer)	Lipids	LPC	-	A	459180	529420	494300	415080	443520	429000	291000	289000	307000	--	--
pmb0855	496.34	184.07	495.332	C24H50NO7P	[M+H]+	LysoPC 16:0	Lipids	LPC	17364-16-8	A	5662500	6344500	6003500	11539000	13064000	12300000	3900000	4570000	4710000	--	--
pmb3000	503.12	341.1	504.127	C24H24O12	[M-H]-	Chrysoeriol-O-acetylhexoside	Flavonoids	Flavonoid	-	B	1573600	1693600	1633600	640680	486290	563000	994000	945000	983000	--	--
pmp000271	505.35	423.33	504.345	C30H48O6	[M+H]+	1β,2α,3α,19α-Tetrahydroxyurs-12-en-28-oic acid	Terpenoids	Triterpene	-	A	199770	201100	200435	52009	60556	56300	96400	94300	87000	--	--
Hmln003605	503.34	485.33	504.346	C30H48O6	[M-H]-	Myrianthic acid	Terpenoids	Triterpene	89786-84-5	A	59754	66806	63280	17532	20983	19300	68100	71100	69500	--	--
Hmln002199	505.1	300.03	506.107	C23H22O13	[M-H]-	Quercetin-3-O-(6''-O-acetyl)-galactoside	Flavonoids	Flavonols	-	A	24080000	24414000	24247000	11006000	11945000	11500000	15900000	17800000	19200000	--	--
pmb2406	510.36	184.07	509.348	C25H52NO7P	[M+H]+	LysoPC 17:0	Lipids	LPC	50930-23-9	B	10127	14731	12429	5811.7	5995.1	5900	4010	4540	3810	--	--
Hmqp006235	516.3	184.07	515.297	C21H46N3O9P	[M+H]+	LysoPC 18:4	Lipids	LPC	-	B	8948.7	9441.6	9195.15	5296.2	5359.3	5330	5470	4460	5980	--	--
pmn001384	515.12	353.09	516.127	C25H24O12	[M-H]-	Isochlorogenic acid C	Phenolic acids	Phenolic acids	57378-72-0	B	9	19158	9583.5	59650	46890	53300	185000	257000	180000	--	--
Li512115	515.12	353.09	516.127	C25H24O12	[M-H]-	3,4-Dicaffeoylquinic acid	Phenolic acids	Phenolic acids	14534-61-3	B	9	30140	15074.5	38317	70079	54200	218000	202000	179000	--	--
pmb0865	518.32	184.07	517.317	C26H48NO7P	[M+H]+	LysoPC 18:3(2n isomer)	Lipids	LPC	-	A	21739000	23588000	22663500	26591000	26877000	26700000	18900000	19800000	20600000	--	--
pmb0854	518.32	184.07	517.317	C26H48NO7P	[M+H]+	LysoPC 18:3	Lipids	LPC	-	A	2482400	2818000	2650200	5048500	4622600	4840000	1600000	1700000	1910000	--	--
pmn001424	517.23	385.18	518.236	C24H38O12	[M-H]-	(6S,7E,9R)-6,9-Dihydroxy-4,7-megastigmadin-3-one-9-O-D-xylopyranosyl(1-6)-glucopyranoside	Others	Others	-	A	120450	136140	128295	279390	202240	241000	414000	476000	605000	--	--
pmp001273	520.34	184.07	519.332	C26H50NO7P	[M+H]+	LysoPC 18:2	Lipids	LPC	-	A	3861900	4398400	4130150	9080600	9865100	9470000	3080000	3410000	3690000	--	--
pmp001251	520.34	184.07	519.332	C26H50NO7P	[M+H]+	LysoPC 18:2(isomer)	Lipids	LPC	-	A	14329000	16297000	15313000	30461000	31451000	31000000	18300000	19700000	19800000	--	--
pmn001644	519.08	300	520.085	C23H20O14	[M-H]-	Quercetin-3-O-(2''-acetyl)-β-D-glucuronide	Flavonoids	Flavonols	-	B	112480	118940	115710	1754000	1696200	1730000	855000	780000	958000	--	--
pmn001378	519.19	357.14	520.194	C26H32O11	[M-H]-	Terpineol monO-glucoside	Lignans and Coumarins	Lignans	-	B	408960	391470	400215	139790	160270	150000	261000	263000	297000	--	--
pmp001281	522.36	184.07	521.348	C26H52NO7P	[M+H]+	LysoPC 18:1	Lipids	LPC	-	A	812130	733400	772765	5647700	5801800	5720000	1610000	1570000	1580000	--	--
pmb3041	521.09	329.2	522.101	C23H22O14	[M-H]-	Tricin O-saccharic acid	Flavonoids	Flavonoid	-	B	869750	854470	862110	585010	561340	573000	922000	774000	900000	--	--
Lmtn002596	521.2	359.14	522.21	C26H34O11	[M-H]-	dihydrodehydrodiconiferyl alcohol 4-O-β-D-glucopyranosides	Lignans and Coumarins	Lignans	-	B	945130	1055900	1000515	31831	29718	30800	857000	866000	895000	--	--
pmd0136	524.37	184.07	523.364	C26H54NO7P	[M+H]+	LysoPC 18:0(2n isomer)	Lipids	LPC	-	A	63407	70351	66879	96978	108540	103000	39100	45800	48100	--	--
mws0126	524.37	184.07	523.364	C26H54NO7P	[M+H]+	LysoPC 18:0	Lipids	LPC	19420-57-6	B	992850	1243200	1118025	2052300	2308200	2180000	629000	759000	712000	--	--
Lmtn003096	523.21	361.14	524.226	C26H36O11	[M-H]-	(-)-secoisolariciresinol 4-O-β-D-giucopyranoside	Lignans and Coumarins	Lignans	-	B	130730	163770	147250	33537	22831	28200	103000	82600	106000	--	--
Lmhn003801	531.12	337.06	532.122	C25H24O13	[M-H]-	feruloylsinapoyltartaric acid	Phenolic acids	Phenolic acids	-	B	79587	48945	64266	9	9	9	23800	31800	34700	--	--
Hmln002483	533.1	489.11	534.101	C24H22O14	[M-H]-	Kaempferol-3-O-(6''-malonyl)-glucoside	Flavonoids	Flavonols	-	A	2668400	2751800	2710100	3976000	4672400	4320000	1630000	1390000	2750000	--	--
Hmln002100	535.18	373.13	536.189	C26H32O12	[M-H]-	Nortrachelogenin 4-O-β-D-glucoside	Lignans and Coumarins	Lignans	-	B	115970	88130	102050	31843	34702	33300	65600	47900	90000	--	--
pmn001375	535.18	373.13	536.189	C26H32O12	[M-H]-	1-Hydroxyterpinin monO-glucoside	Lignans and Coumarins	Lignans	-	B	314430	295140	304785	27862	36945	32400	142000	132000	121000	--	--
Zmhp006502	549.12	301.07	548.117	C25H24O14	[M+H]+	Kaempferide-malonylhexoside	Flavonoids	Flavonoid	-	A	3397.8	21029	12213.4	1167700	1388000	1280000	282000	291000	308000	--	--
pmn001459	547.17	205.1	548.174	C23H32O15	[M-H]-	Sibiricose A6	Phenolic acids	Phenolic acids	241125-75-7	B	18343	9	9176	9779.2	7147.9	8460	34900	44100	59800	--	--
pmp000589	551.1	303.05	550.096	C24H22O15	[M+H]+	Quercetin-7-O-(6'-O-malonyl)-β-D-glucoside	Flavonoids	Flavonols	-	A	1497100	1688000	1592550	833330	827890	831000	848000	1130000	923000	--	--
Hmln002321	549.09	300	550.096	C24H22O15	[M-H]-	Quercetin-3-O-(6''-O-malonyl)-glucoside	Flavonoids	Flavonols	-	A	1979500	2600600	2290050	306100	343110	325000	751000	772000	775000	--	--
pmb2979	549.12	387.1	550.132	C25H26O14	[M-H]-	Hesperetin O-malonylhexoside	Flavonoids	Dihydroflavonol	-	B	138520	144540	141530	9	9	9	98400	74100	67400	--	--
mws1138	551.15	303.04	550.143	C24H26N2O13	[M+H]+	Betanin	Alkaloids	Alkaloids	7659-95-2	B	1183800	1404400	1294100	589090	583430	586000	681000	799000	700000	--	--
pmb3114	561.14	289.2	562.148	C30H26O11	[M-H]-	Epicatechin-epiafzelechin	Flavonoids	Flavanols	-	B	59728	56316	58022	9	9	9	74800	99800	88200	--	--
HJAP064	565.12	317.08	564.088	C25H24O15	[M+H]+	Isorhamnetin O-malonylglucoside	Flavonoids	Flavonoid	-	A	3790000	4433200	4111600	34227000	36887000	35600000	16000000	14800000	15900000	--	--
pmb2922	565.05	323.1	566.055	C15H24N2O17P2	[M-H]-	Uridine 5'-diphospho-D-glucose	Nucleotides and derivatives	Nucleotides and derivatives	133-89-1	A	578310	527680	552995	408350	401660	405000	840000	665000	602000	C00029	ko00040,ko00052,ko00053,ko00240,ko00500,ko00520,ko00561,ko00908,ko01100,ko01110
Lmtp004126	567.1	319.04	566.091	C24H22O16	[M+H]+	"Myricetin-3-O-(6""-malony)glucoside"	Flavonoids	Flavonols	-	A	257370	241800	249585	9	9	9	78800	104000	90200	--	--
Hmpn005039	567.17	273.08	568.182	C26H32O14	[M-H]-	Phloretin-2'-xyloglucoside	Flavonoids	Flavonoid	-	A	21761000	23271000	22516000	76057000	68439000	72200000	47600000	41500000	50200000	--	--
pmp000237	579.13	283.06	578.127	C26H26O15	[M+H]+	Apigenin-6-C-2-glucuronylxyloside	Flavonoids	Flavonoid carbonoside	-	B	47320	49368	48344	9394.5	6974.2	8180	65400	64100	58100	--	--
pme0434	577.14	407.1	578.142	C30H26O12	[M-H]-	Procyanidin B2	Tannins	Proanthocyanidins	29106-49-8	A	457270	488550	472910	51199	42947	47100	866000	778000	853000	C17639	--
Lmpp003930	579.15	271.06	578.142	C30H26O12	[M+H]+	Apigenin-7-O-(2''-O-p-Coumarylglucoside)	Flavonoids	Flavonoid	-	B	130020	129240	129630	22699	39091	30900	206000	206000	162000	--	--
pmp000274	579.15	409.09	578.142	C30H26O12	[M+H]+	Procyanidin B3	Tannins	Proanthocyanidins	23567-23-9	A	2343200	2307400	2325300	664490	878880	772000	4100000	4030000	3670000	--	--
mws0836	577.14	425.1	578.142	C30H26O12	[M-H]-	Procyanidin B1	Tannins	Proanthocyanidins	20315-25-7	A	253250	272000	262625	29394	30388	29900	462000	474000	401000	--	--
pmn001667	577.14	407.1	578.142	C30H26O12	[M-H]-	Procyanidin B4	Tannins	Proanthocyanidins	29106-51-2	A	1053800	1444000	1248900	340300	269580	305000	2340000	1990000	1880000	C10238	--
pme2493	579.17	287.1	578.164	C27H30O14	[M+H]+	Kaempferol-3,7-O-dirhamnoside(Kaempferitrin)	Flavonoids	Flavonols	482-38-2	B	234900	220270	227585	45942	54034	50000	319000	396000	330000	C16981	--
pme0368	579.17	271.01	578.164	C27H30O14	[M+H]+	Apigenin 7-rutinoside(Isorhoifolin)	Flavonoids	Flavonoid	552-57-8	B	85870	97503	91686.5	16432	17208	16800	164000	110000	144000	--	--
Smsp002643	579.17	271.06	579.171	C27H31O14+	[M]+	Pelargonidin-3-O-rutinoside	Flavonoids	Anthocyanins	-	B	72972	77491	75231.5	10921	9173.2	10000	184000	144000	151000	C12644	ko00942
mws0046	579.17	271.06	580.179	C27H32O14	[M-H]-	Naringenin-7-O-Neohesperidoside(Naringin)	Flavonoids	Dihydroflavone	10236-47-2	B	19066	10198	14632	7091.8	7701.8	7400	68100	68800	54700	C09789	ko00941
HJAP134	581.18	257.08	580.179	C27H32O14	[M+H]+	Dihydrochrysin-O-glucoside-O-glucoside	Flavonoids	Flavonoid	-	B	118200	117520	117860	8324.7	16717	12500	41800	44400	37400	--	--
Rfmb26203	579.21	417.16	580.216	C28H36O13	[M-H]-	Syringaresinol-Hex	Lignans and Coumarins	Lignans	-	A	4860500	4763500	4812000	105490	101900	104000	2350000	2100000	2180000	--	--
Zmxn004029	585.23	195.07	586.241	C31H38O11	[M-H]-	7，8-dihydro-Buddlenol B (erythro)	Lignans and Coumarins	Lignans	-	B	1791200	2115400	1953300	314170	298200	306000	1520000	1410000	1440000	--	--
Zmxn003874	585.23	537.21	586.241	C31H38O11	[M-H]-	7，8-dihydro-Buddlenol B (threo)	Lignans and Coumarins	Lignans	-	B	3442300	3896400	3669350	1468900	1405300	1440000	3200000	3120000	3120000	--	--
Zmxp005604	595.15	147.04	594.137	C30H26O13	[M+H]+	"Kaenpferol-3-O-β-D-(6""-p-hydroxygalloy)-glucopyranoside"	Flavonoids	Flavonoid	-	B	570590	654530	612560	2676700	2916400	2800000	737000	780000	847000	--	--
mws1290	593.13	285	594.137	C30H26O13	[M-H]-	Tiliroside	Flavonoids	Flavonols	20316-62-5	A	2467900	2504000	2485950	7820900	8660500	8240000	3210000	3080000	3370000	C17140	--
HJN050	593.15	285.04	594.158	C27H30O15	[M-H]-	Kaempferol-7-O-neohesperidoside	Flavonoids	Flavonoid	-	A	2669800	2375600	2522700	4070400	4762700	4420000	2190000	2250000	2000000	--	--
pme0369	593.15	285	594.158	C27H30O15	[M-H]-	Kaempferol-3-O-rutinoside(Nicotiflorin)	Flavonoids	Flavonols	17650-84-9	B	8693700	9984300	9339000	13952000	15581000	14800000	9540000	9470000	9790000	C21833	ko00944,ko01110
Lmpp003789	595.14	287.06	595.145	C30H27O13+	[M]+	Cyanidin-3-O-(6''-p-Coumaroylglucoside)	Flavonoids	Anthocyanins	-	B	9096100	8988900	9042500	18787000	22102000	20400000	7240000	8080000	7350000	C12095	ko00942
Lmlp002975	597.14	303.05	596.137	C26H28O16	[M+H]+	Quercetin-3-O-β-D-xylopyranosyl-(1→2)-β-D-galactopyranoside	Flavonoids	Flavonoid	-	B	162740	148730	155735	50077	90170	70100	168000	156000	158000	--	--
Lmqn000780	606.08	384.98	607.082	C17H27N3O17P2	[M-H]-	UDP-N-acetylglucosamine	Alkaloids	Alkaloids	528-04-1	B	9049.2	10264	9656.6	10339	11637	11000	17800	19800	12400	--	--
Lmmp000897	611.14	287.05	610.132	C30H26O14	[M+H]+	Gallocatechin-Gallocatechin	Flavonoids	Flavanols	-	B	183140	178100	180620	74274	68653	71500	90700	105000	89800	--	--
Lmyp004052	611.14	303.05	610.132	C30H26O14	[M+H]+	Quercetin 3-O-(6''-trans-p-Coumaroyl)-β-D-galactopyranoside	Flavonoids	Flavonoid	-	B	50756	90975	70865.5	12407	22145	17300	33800	25700	31000	--	--
pmb0665	611.16	465.1	610.153	C27H30O16	[M+H]+	Luteolin-8-C-hexosyl-O-hexoside	Flavonoids	Flavonoid	-	B	1056600	1094700	1075650	245450	316740	281000	491000	616000	613000	--	--
Lmbp002592	611.16	287.05	610.153	C27H30O16	[M+H]+	Kaempferol-3,7-di-O-β-D-glucopyranoside	Flavonoids	Flavonoid	-	B	165930	178240	172085	62300	72840	67600	89000	98900	108000	--	--
mws0059	609.15	301	610.153	C27H30O16	[M-H]-	Quercetin-3-O-rutinoside (Rutin)	Flavonoids	Flavonols	153-18-4	A	38494000	36451000	37472500	9152500	10378000	9770000	26000000	21600000	24500000	C05625	ko00944,ko01100,ko01110
Lmpp003662	611.14	303.05	611.14	C30H27O14+	[M]+	Delphinidin-3-O-(6''-p-Coumaroylglucoside)	Flavonoids	Anthocyanins	-	B	22693000	23174000	22933500	5854700	6259900	6060000	12700000	12100000	11700000	C16370	ko00942
mws4134	611.14	306.08	612.152	C20H32N6O12S2	[M-H]-	Oxidized Glutathione	Amino acids and derivatives	Amino acids and derivatives	121-24-4	A	89250	98308	93779	27876	35000	31400	53900	53600	51300	--	--
pmp000781	619.4	437.34	618.392	C39H54O6	[M+H]+	p-Coumaroyleuscaphic acid	Terpenoids	Triterpene	-	A	742790	572030	657410	292660	286430	290000	434000	228000	286000	--	--
Lmhp003217	625.17	317.06	624.169	C28H32O16	[M+H]+	2'-Hydoxy,5-methoxy Genistein-O-rhamnosyl-glucoside	Flavonoids	Isoflavones	-	A	4098800	3899100	3998950	30862000	31303000	31100000	11800000	10400000	11400000	--	--
Lmpp003815	625.16	317.07	625.155	C31H29O14+	[M]+	Petunidin-3-(6''-p-Coumaroylglucoside)	Flavonoids	Anthocyanins	-	A	4590800	3709800	4150300	29006000	32570000	30800000	9870000	10400000	10800000	--	--
pmp001311	627.16	303.1	626.148	C27H30O17	[M+H]+	6-Hydroxykaempferol-7,6-O-Diglucoside	Flavonoids	Flavonols	-	A	2513800	2817800	2665800	98712	93930	96300	821000	841000	906000	--	--
pmp001310	627.16	303.1	626.148	C27H30O17	[M+H]+	6-Hydroxykaempferol-3,6-O-Diglucoside	Flavonoids	Flavonols	-	A	706550	895310	800930	52140	47475	49800	303000	376000	395000	--	--
pmp000596	627.16	465.1	626.148	C27H30O17	[M+H]+	Quercetin-3,7-O-β-D-diglucoside	Flavonoids	Flavonols	-	A	177380	160140	168760	62878	72006	67400	139000	116000	106000	--	--
pmb0618	627.19	465.1	626.185	C28H34O16	[M+H]+	8-C-Hexosyl-hesperetin O-hexoside	Flavonoids	Flavonoid carbonoside	-	B	561790	621830	591810	49262	65562	57400	273000	260000	277000	--	--
pmp000782	635.39	435.32	634.387	C39H54O7	[M+H]+	Caffeoyl hawthorn acid	Terpenoids	Triterpene	-	A	5866600	6469300	6167950	5259700	3926500	4590000	3560000	3600000	3570000	--	--
Hmyp007792	636.41	495.4	635.414	C32H62NO9P	[M+H]+	PE(oxo-11:0/16:0)	Lipids	Glycerol ester	-	B	159720	234170	196945	114900	153190	134000	107000	108000	94900	--	--
pmb0530	664.12	136.2	663.109	C21H27N7O14P2	[M+H]+	Nicotinic acid adenine dinucleotide	Nucleotides and derivatives	Nucleotides and derivatives	53-84-9	B	73586	73943	73764.5	6018.6	9660.4	7840	28600	35500	30700	C00003	ko00190,ko00730,ko00760,ko01100
pmp000780	665.4	409.3	664.398	C40H56O8	[M+H]+	3-O-Trans-feruloyl euscaphic acid	Terpenoids	Triterpene	-	A	242290	227660	234975	17958	24000	21000	73000	69100	77900	--	--
pmp001275	672.42	331.29	671.409	C31H61O14N	[M+H]+	3-Hydroxypropyl palmitate glc-glucosamine	Alkaloids	Alkaloids	-	A	208760	171420	190090	91954	67139	79500	87300	69400	94900	--	--
pmp001276	677.37	677.37	676.367	C33H56O14	[M+H]+	2,3-Dihydroxypropyl-9,12,15-octadecatrienoate-hexose-hexose	Lipids	Free fatty acids	-	B	666140	816700	741420	194600	140350	167000	316000	275000	334000	--	--
pmb0168	700.1	184.4	699.435	C38H70NO8P	[M+H]+	PC 16:1/14:1	Lipids	PC	-	B	3168.8	3848.7	3508.75	1208.7	1194	1200	7360	8350	8880	--	--
Hmyp007396	702.46	184.07	701.46	C37H68NO9P	[M+H]+	PC(oxo-11:0/18:2)	Lipids	PC	-	A	79414	91961	85687.5	45193	41785	43500	79000	103000	81300	--	--
pmb0706	713.16	465.1	712.149	C30H32O20	[M+H]+	Quercetin-5-O-malonylhexosyl-hexoside	Flavonoids	Flavonols	-	A	196650	210430	203540	65673	76014	70800	163000	159000	152000	--	--
pmb0709	713.16	465.2	712.149	C30H32O20	[M+H]+	Quercetin-7-O-malonylhexosyl-hexoside	Flavonoids	Flavonols	-	A	82683	82106	82394.5	74815	63127	69000	79700	94700	92300	--	--
pmb2991	739.21	269.2	740.216	C33H40O19	[M-H]-	Apigenin O-hexosyl-O-rutinoside	Flavonoids	Flavonoid	-	B	12675	6578.5	9626.75	13756	21540	17600	36400	29200	45200	--	--
Hmyp008441	762.48	184.07	761.481	C39H72NO11P	[M+H]+	PE(16:0/18:3+O3)	Lipids	Glycerol ester	-	B	2710.6	2734.3	2722.45	2576.8	2537.5	2560	2460	1310	3720	--	--
GQ512001	771.2	609.1	772.206	C33H40O21	[M-H]-	Quercetin-O-rutinoside-hexose	Flavonoids	Flavonols	-	B	128470	109560	119015	7511.9	10229	8870	67400	67500	58500	--	--
Hmyp007589	784.47	643.46	783.466	C41H70NO11P	[M+H]+	PE(18:3/18:3+O3)	Lipids	Glycerol ester	-	B	10894	9353.4	10123.7	8737.7	13541	11100	8930	15300	9610	--	--
pmn001646	865.2	577.1	866.206	C45H38O18	[M-H]-	Procyanidin C1	Tannins	Proanthocyanidins	37064-30-5	A	2429100	2055000	2242050	406330	525730	466000	3720000	3480000	3620000	C17624	--
pmb2947	865.2	407.1	866.206	C45H38O18	[M-H]-	Catechin-catechin-catechin	Flavonoids	Flavanols	-	A	181640	148300	164970	19084	18090	18600	398000	436000	437000	--	--
pmn001647	865.2	713.2	866.206	C45H38O18	[M-H]-	Procyanidin C2	Tannins	Proanthocyanidins	37064-31-6	A	471620	474650	473135	25839	38249	32000	661000	811000	695000	--	--
pmn001650	1153.26	575.1	1154.27	C60H50O24	[M-H]-	Cinnamtannin B2	Tannins	Proanthocyanidins	88038-12-4	B	211190	205260	208225	13582	8714.3	11100	343000	419000	397000	C17629	--
pmn001649	1153.26	1001.2	1154.27	C60H50O24	[M-H]-	Cinnamtannin A2	Tannins	Proanthocyanidins	86631-38-1	A	93084	101020	97052	9	9471.4	4740	146000	172000	174000	C17625	--
