# Supplementary material for: Analysis of metabolites in young and mature Docynia delavayi (Franch.) Schneid leaves using UPLC-ESI-MS/MS
Source: PeerJ. 2022 Feb 4;10:e12844. doi: 10.7717/peerj.12844 (PMC8820213; doi:10.7717/peerj.12844)
Supplement: Supplemental Information 2 [file peerj-10-12844-s002.xlsx]

## Sheet: Sheet1
Table. S.1 Differential metabolites of young and mature D. delayayi leaves
Compounds	Class I	VIP	Log2FC	Type
Myricetin 3-O-galactoside	Flavonoids	1.06517	17.7864	up
Catechin-(7,8-bc)-4β-(3,4-dihydroxyphenyl)-dihydro-2-(3H)-pyranone	Flavonoids	1.06522	14.8033	up
"Myricetin-3-O-(6""-malony)glucoside"	Flavonoids	1.06522	14.7592	up
feruloylmalic acid	Phenolic acids	1.06489	14.2746	up
Hesperetin O-malonylhexoside	Flavonoids	1.06523	13.9408	up
Kaempferol-3-O-rhamnoside (Afzelin)(Kaempferin)	Flavonoids	1.06523	13.8699	up
Glutathione reduced form	Amino acids and derivatives	1.06523	13.0101	up
feruloylsinapoyltartaric acid	Phenolic acids	1.06465	12.8018	up
Aminopurine	Alkaloids	1.06515	12.7011	up
Epicatechin-epiafzelechin	Flavonoids	1.06522	12.6544	up
Apigenin-C-rhamnoside	Flavonoids	1.06496	10.3899	up
3β,19α-Dihydroxyolean-12-en-28-oic acid	Terpenoids	1.06517	10.3469	up
Cinchonain Ic	Flavonoids	1.06285	6.69839	up
Syringic Aldehyde-glucoside	Phenolic acids	1.0641	6.01015	up
L-Ascorbic acid	Others	1.05406	5.67152	up
1-O-(3,4-dihydroxy-5-methoxy-benzoyl)-β-D-glucoside	Phenolic acids	1.06502	5.63583	up
Syringaresinol-Hex	Lignans and Coumarins	1.06521	5.5348	up
Apigenin 5-O-glucoside	Flavonoids	1.06447	5.24336	up
2'-Deoxyadenosine-5'-monophosphate	Nucleotides and derivatives	1.06036	5.05612	up
dihydrodehydrodiconiferyl alcohol 4-O-β-D-glucopyranosides	Lignans and Coumarins	1.065	5.02247	up
Epicatechin glucoside	Flavonoids	1.06429	4.90966	up
6-Hydroxykaempferol-7,6-O-Diglucoside	Flavonoids	1.065	4.79068	up
Sanguisorbigenin	Terpenoids	1.06178	4.52582	up
Cinnamtannin B2	Tannins	1.06122	4.22535	up
Syringaresinol	Lignans and Coumarins	1.06512	4.16788	up
5-(2-Hydroxyethyl)-2-O-glucosylohenol	Phenolic acids	1.06382	4.05322	up
6-Hydroxykaempferol-3,6-O-Diglucoside	Flavonoids	1.06379	4.00731	up
Ursolic acid-OCH3	Terpenoids	1.06518	3.96512	up
Procyanidin C2	Tannins	1.0615	3.88479	up
Quercetin-O-rutinoside-hexose	Flavonoids	1.06203	3.74602	up
Esculin(6,7-DihydroxyCoumarin-6-glucoside)	Lignans and Coumarins	1.06447	3.60007	up
Sweroside	Terpenoids	1.062	3.52545	up
3-O-Trans-feruloyl euscaphic acid	Terpenoids	1.06255	3.48501	up
8-C-Hexosyl-hesperetin O-hexoside	Flavonoids	1.06227	3.36581	up
Kaempferol-7-O-rhamnoside	Flavonoids	1.05904	3.36181	up
Gallacetophenone	Others	1.06474	3.33735	up
Eudesmoyl quinic acid	Phenolic acids	1.06513	3.33012	up
Procyanidin B2	Tannins	1.06409	3.32832	up
Quercetin-3-O-α-L-rhamnoside(Quercitrin )	Flavonoids	1.06519	3.31814	up
3-O-Feruloyl quinic acid	Phenolic acids	1.02193	3.28104	up
Sibiricose A3	Phenolic acids	1.03935	3.23707	up
Dihydrochrysin-O-glucoside-O-glucoside	Flavonoids	1.0489	3.23547	up
Nicotinic acid adenine dinucleotide	Nucleotides and derivatives	1.05749	3.23406	up
1-Hydroxyterpinin monO-glucoside	Lignans and Coumarins	1.06227	3.23362	up
Catechin-catechin-catechin	Flavonoids	1.06353	3.1495	up
Procyanidin B1	Tannins	1.06501	3.13508	up
Salvianolic acid N	Phenolic acids	1.06374	3.08792	up
4-Pyridoxic acid O-hexoside	Others	1.02985	3.00725	up
L-(-)-Cystine	Amino acids and derivatives	1.06511	3.00589	up
2,3-Dihydroxy 5(6),12(13)diene ursolic acid	Terpenoids	1.06472	2.97075	up
Rutundic acid	Terpenoids	1.0635	2.95165	up
Pelargonidin-3-O-rutinoside	Flavonoids	1.06378	2.90681	up
Camaldulenic acid	Terpenoids	1.06504	2.85029	up
Quercetin-3-O-(6''-O-malonyl)-glucoside	Flavonoids	1.06122	2.81804	up
2-O-Galloyl-β-D-glucose	Tannins	1.05626	2.74183	up
Methyl dioxindole-3-acetate	Others	1.05549	2.71257	up
7，8-dihydro-Buddlenol B (erythro)	Lignans and Coumarins	1.06371	2.67373	up
salicylic acid O-glycoside	Phenolic acids	1.06507	2.66203	up
4-Pyridoxic acid	Others	1.06307	2.58351	up
Apigenin-6-C-2-glucuronylxyloside	Flavonoids	1.06025	2.56265	up
Methyl ferulate	Phenolic acids	1.06279	2.46196	up
Apigenin 7-rutinoside(Isorhoifolin)	Flavonoids	1.06414	2.4471	up
Isorhamnetin-O-gallate	Flavonoids	1.06426	2.40465	up
(-)-secoisolariciresinol 4-O-β-D-giucopyranoside	Lignans and Coumarins	1.05276	2.38505	up
Daidzein-4'-glucoside	Flavonoids	1.0413	2.289	up
Procyanidin C1	Tannins	1.05845	2.26635	up
Roseoside	Others	1.06142	2.23923	up
Isoscopoletin (6-Hydroxy-7-Methoxycoumarin)	Lignans and Coumarins	1.05335	2.19299	up
Kaempferol-3,7-O-dirhamnoside(Kaempferitrin)	Flavonoids	1.06285	2.18664	up
3,4-Dimethoxycinnamic acid	Phenolic acids	1.06205	2.18424	up
Gastrodin	Phenolic acids	1.06288	2.15092	up
2,3-Dihydroxypropyl-9,12,15-octadecatrienoate-hexose-hexose	Lipids	1.05372	2.14771	up
Apigenin-7-O-(2''-O-p-Coumarylglucoside)	Flavonoids	1.04124	2.06888	up
Euscaphic acid	Terpenoids	1.06047	2.04074	up
Quercetin 3-O-(6''-trans-p-Coumaroyl)-β-D-galactopyranoside	Flavonoids	1.00939	2.03565	up
Procyanidin B4	Tannins	1.05183	2.03397	up
2,6-Diaminooimelic acid	Amino acids and derivatives	1.06046	2.02861	up
Naringenin-7-O-glucoside	Flavonoids	1.06394	1.98612	up
sinapoyltartaric acid	Phenolic acids	1.0553	1.98454	up
Quercetin-3-O-rutinoside (Rutin)	Flavonoids	1.06336	1.93987	up
Scopoletin??Beta-D-Glucuronide	Lignans and Coumarins	1.06187	1.93962	up
Luteolin-8-C-hexosyl-O-hexoside	Flavonoids	1.0588	1.93624	up
Delphinidin-3-O-(6''-p-Coumaroylglucoside)	Flavonoids	1.06474	1.9205	up
2-oxo-pomolic acid	Terpenoids	1.06496	1.91594	up
Trans,trans-Muconic acid	Organic acids	1.05223	1.89311	up
8-methoxykaempferol-7-O-rhamnoside	Flavonoids	1.05828	1.87825	up
Rosamultic acid	Terpenoids	1.06413	1.84715	up
5,7,4'-trihydroxy isoflavone-7-O-galactoside	Flavonoids	1.04555	1.83775	up
1β,2α,3α,19α-Tetrahydroxyurs-12-en-28-oic acid	Terpenoids	1.06268	1.83223	up
Feruloyl glucose	Phenolic acids	1.06404	1.81134	up
Diosmetin-7-O-galactoside	Flavonoids	1.06006	1.76952	up
Dihydrokaempferol-7-O-glucoside	Flavonoids	1.06506	1.76497	up
Myrianthic acid	Terpenoids	1.05971	1.71527	up
Pyridoxine	Others	1.05885	1.69766	up
Sepiapterin(L-SEPIAPTERIN)COFACTOR OF NITRIC OX	Nucleotides and derivatives	1.03258	1.69655	up
Isohemiphloin	Flavonoids	1.05848	1.69388	up
Epicatechin	Flavonoids	1.0638	1.65449	up
Nortrachelogenin 4-O-β-D-glucoside	Lignans and Coumarins	1.05341	1.61648	up
Procyanidin B3	Tannins	1.05405	1.59114	up
Oxidized Glutathione	Amino acids and derivatives	1.05635	1.57734	up
Glucosyringic Acid	Phenolic acids	1.06217	1.55185	up
PC 16:1/14:1	Lipids	1.05948	1.54684	up
Chlorogenic acid	Phenolic acids	1.06431	1.54402	up
Chrysoeriol-O-acetylhexoside	Flavonoids	1.05291	1.53602	up
Pinocembrin 7-O-β-D-glucoside(Pinocembroside)	Flavonoids	1.06503	1.53338	up
Quercetin-5-O-malonylhexosyl-hexoside	Flavonoids	1.06115	1.5229	up
Trans-Citridic acid	Organic acids	1.05733	1.50987	up
Betaine	Alkaloids	1.06377	1.4927	up
Hesperetin 5-O-glucoside	Flavonoids	1.06183	1.45744	up
Quercetin-3-O-β-D-glucoside(Isoquercitrin)*	Flavonoids	1.05398	1.42418	up
1-Aminocyclopropane-1-carboxylic acid	Others	1.05885	1.41776	up
Terpineol monO-glucoside	Lignans and Coumarins	1.06142	1.41562	up
Chlorogenic acid methyl ester	Phenolic acids	1.06458	1.4087	up
6-O-Galloyl-β-D-glucose	Tannins	1.05269	1.40449	up
Chrysin-7-glucoside	Flavonoids	1.06491	1.39419	up
L-AsparticAcid	Amino acids and derivatives	1.06496	1.39288	up
Quercetin-3-O-β-D-Galactoside (Hyperin)*	Flavonoids	1.05184	1.37778	up
Genistein	Flavonoids	1.0611	1.37103	up
Avicularin	Flavonoids	1.06263	1.35478	up
7，8-dihydro-Buddlenol B (threo)	Lignans and Coumarins	1.06182	1.35139	up
Kaempferol-3,7-di-O-β-D-glucopyranoside	Flavonoids	1.05932	1.34845	up
Ursolic acid	Terpenoids	1.00615	1.34447	up
Gallocatechin-Gallocatechin	Flavonoids	1.06379	1.33743	up
4-Caffeoylquinic acid	Phenolic acids	1.05714	1.33541	up
Quercetin-3,7-O-β-D-diglucoside	Flavonoids	1.05912	1.32355	up
Scopolin	Lignans and Coumarins	1.06004	1.31514	up
Chrysoeriol-5-O-hexoside	Flavonoids	1.05297	1.27982	up
(7R，8S)-dihydrodehydrodiconiferyl alcohol	Lignans and Coumarins	1.06284	1.27608	up
3-Hydroxypropyl palmitate glc-glucosamine	Alkaloids	1.03462	1.25709	up
Cis-3-p-coumaric quinic acid	Phenolic acids	1.06419	1.24275	up
3-O-Galloyl-β-D-glucose	Tannins	1.05597	1.22858	up
Inositol	Others	1.03897	1.21922	up
Isoscoparin	Flavonoids	1.0604	1.20449	up
Taxifolin-3'-O-β-D-glucoside	Flavonoids	1.06159	1.20372	up
Kaempferol-3-arabinopyranoside	Flavonoids	1.05819	1.20357	up
p-Coumaroyleuscaphic acid	Terpenoids	1.04705	1.18225	up
Fraxin	Lignans and Coumarins	1.02359	1.14572	up
Betanin	Alkaloids	1.0571	1.14255	up
Coniferin	Phenolic acids	1.06338	1.09715	up
L-Glutamic acid	Amino acids and derivatives	1.05531	1.09157	up
Quercetin-3-O-(6''-O-acetyl)-galactoside	Flavonoids	1.06305	1.07822	up
LysoPC 17:0	Lipids	1.02151	1.07437	up
Pyrogallol	Others	1.04759	1.05627	up
Fustin	Flavonoids	1.06058	1.04583	up
Salidroside	Phenolic acids	1.05429	1.03659	up
Cis-10-Heptadecenoic Acid	Lipids	1.06318	1.00257	up
LysoPC 18:2(isomer)	Lipids	1.05891	-1.01615	down
Undecylic Acid	Lipids	1.05983	-1.01832	down
3-Methyl-2-Oxobutanoic acid	Organic acids	1.03124	-1.02102	down
LysoPC 16:0	Lipids	1.0555	-1.0349	down
4-Hydroxybenzaldehyde	Phenolic acids	1.05651	-1.04626	down
Eicosadienoic acid	Lipids	1.0591	-1.04812	down
N-Acetyl-D-galactosamine	Others	1.03876	-1.10627	down
Riboflavin	Others	1.05351	-1.14454	down
Tyrosol	Phenolic acids	1.0587	-1.15166	down
Cyanidin-3-O-(6''-p-Coumaroylglucoside)	Flavonoids	1.0582	-1.17587	down
Terephthalic acid	Phenolic acids	1.05773	-1.18441	down
LysoPC 18:2	Lipids	1.05909	-1.19746	down
Deoxyguanosine	Nucleotides and derivatives	1.05696	-1.22312	down
N-Acetylthreonine	Amino acids and derivatives	1.0518	-1.23796	down
N-Oleoylethanolamine	Others	1.05715	-1.23822	down
Methyl-(2,4-dihydroxyphenyl)acetate	Phenolic acids	1.04048	-1.2466	down
5,7,8,4'-Tetramethoxyflavone	Flavonoids	1.03625	-1.256	down
6,7,8-Tetrahydroxy-5-methoxyflavone	Flavonoids	1.05233	-1.26996	down
3-(4-Hydroxyphenyl)-propionic acid	Phenolic acids	1.06518	-1.27272	down
Diosmetin	Flavonoids	1.0458	-1.31367	down
LysoPE 14:0	Lipids	1.05123	-1.34178	down
Glycyl-L-proline	Amino acids and derivatives	1.02234	-1.34265	down
LysoPE 16:0	Lipids	1.06513	-1.35369	down
Phenethylamine	Others	1.05214	-1.37016	down
N6-Acetyl-L-lysine	Amino acids and derivatives	1.06348	-1.39688	down
Nicotianamine	Amino acids and derivatives	1.03702	-1.39813	down
Xylitol	Others	1.05945	-1.42733	down
Guanosine 5'-monophosphate	Nucleotides and derivatives	1.05619	-1.42943	down
Chrysin	Flavonoids	1.05679	-1.43362	down
12,13-EODE	Lipids	1.05628	-1.43611	down
Vanillin	Phenolic acids	1.05712	-1.47313	down
Agmatine	Alkaloids	1.05611	-1.47349	down
LysoPE 18:2	Lipids	1.06432	-1.4815	down
L-Arabitol	Others	1.05904	-1.49688	down
Nicotinamide	Others	1.06059	-1.53209	down
9S-Hyroxy-10E,12E-octadecadienoic acid	Lipids	1.06476	-1.53998	down
Punicic acid	Lipids	1.0652	-1.54745	down
4-Guanidinobutyric acid	Organic acids	1.06284	-1.56357	down
Sinapinaldehyde	Phenolic acids	1.0636	-1.56696	down
LysoPE 18:1(2n isomer)	Lipids	1.06364	-1.59602	down
LysoPC 15:1	Lipids	1.06196	-1.59608	down
Elaidic Acid	Lipids	1.06519	-1.66442	down
Isorhamnetin-3-O-glucoside*	Flavonoids	1.0623	-1.67458	down
Phloretin-2'-xyloglucoside	Flavonoids	1.06314	-1.68169	down
Deoxycytidine	Nucleotides and derivatives	1.05929	-1.70089	down
3-Hydroxy-3-methyl butyric acid	Organic acids	1.06398	-1.72027	down
Trihydroxycinnamoylquinic acid	Phenolic acids	1.06522	-1.72082	down
Tiliroside	Flavonoids	1.06392	-1.72893	down
N6-Succinyl Adenosine	Nucleotides and derivatives	1.05956	-1.73077	down
11-Octadecanoic acid(Vaccenic acid)	Lipids	1.06465	-1.74064	down
5'-Deoxy-5'-(methylthio)adenosine	Nucleotides and derivatives	1.06245	-1.75125	down
Eriodictyol C-hexoside	Flavonoids	1.0646	-1.78586	down
5-Hydroxyhexanoic acid	Organic acids	1.06271	-1.80968	down
Apigenin-8-C-Glucoside (Vitexin)	Flavonoids	1.02504	-1.81003	down
L-Glutamine	Amino acids and derivatives	1.06467	-1.82972	down
3-Hydroxy-3-methylpentane-1,5-dioic acid	Amino acids and derivatives	1.06267	-1.83546	down
Cytosine	Nucleotides and derivatives	1.06298	-1.89528	down
L-Methionine	Amino acids and derivatives	1.0647	-1.8958	down
Glycylphenylalanine	Amino acids and derivatives	1.06201	-1.90231	down
DL-Alanyl-DL-phenylalanine	Amino acids and derivatives	1.06174	-1.91204	down
3,4-Dihydroxybenzaldehyde	Phenolic acids	1.05763	-1.91442	down
13-Oxo-9-hydroxy-10-octadecenoic acid	Lipids	1.05844	-1.9248	down
N-Methyl-4-aminobutyric acid	Organic acids	1.03661	-1.92928	down
Histamine	Amino acids and derivatives	1.06403	-1.93814	down
N-Acetylputrescine	Alkaloids	1.04293	-1.96285	down
L-(+)-Lysine	Amino acids and derivatives	1.06389	-1.98433	down
D-Arabitol	Others	1.06454	-1.99373	down
p-hydroxymandelonitrile	Alkaloids	1.06224	-2	down
N-Glycyl-L-leucine	Amino acids and derivatives	1.06238	-2.07111	down
Ribitol	Others	1.06406	-2.09979	down
Kaempferol-3-O-(6''-acetyl)-glucoside	Flavonoids	1.05503	-2.10015	down
Cytidine	Nucleotides and derivatives	1.06499	-2.13858	down
Guanosine	Nucleotides and derivatives	1.0619	-2.14646	down
Sodium ferulate	Others	1.06458	-2.16787	down
2-hydroxyhexadecanoic acid	Organic acids	1.06369	-2.17744	down
"Kaenpferol-3-O-β-D-(6""-p-hydroxygalloy)-glucopyranoside"	Flavonoids	1.06317	-2.19132	down
Trans-4-Hydroxycinnamic Acid Methyl Ester	Phenolic acids	1.06403	-2.2946	down
Choline alfoscerate	Lipids	1.05969	-2.31562	down
Coniferyl alcohol	Phenolic acids	1.05847	-2.33619	down
Caffeic acid	Phenolic acids	1.06326	-2.34539	down
2-hydroxy-3-phenylpropanoic acid	Organic acids	1.0639	-2.35185	down
D-Pantothenic Acid	Others	1.05733	-2.40911	down
N-Benzylmethylene isomethylamine	Alkaloids	1.06306	-2.51451	down
Ser-Ile	Amino acids and derivatives	1.06252	-2.52208	down
Alanylleucine	Amino acids and derivatives	1.05228	-2.53046	down
Asp-phe	Amino acids and derivatives	1.05512	-2.5516	down
Uridine	Nucleotides and derivatives	1.06452	-2.59245	down
Hypoxanthine	Nucleotides and derivatives	1.05991	-2.64079	down
L-Phenylalanine	Amino acids and derivatives	1.06448	-2.66274	down
Nicotinic acid	Others	1.06437	-2.66379	down
Allopurinol	Nucleotides and derivatives	1.06522	-2.69233	down
Adenine	Nucleotides and derivatives	1.06409	-2.78335	down
LysoPC 16:1	Lipids	1.05872	-2.80295	down
Ferulic acid	Phenolic acids	1.06436	-2.81899	down
S-(methyl)glutathione	Amino acids and derivatives	1.0401	-2.82984	down
Adipic Acid	Organic acids	1.06071	-2.86814	down
LysoPC 18:1	Lipids	1.06477	-2.88871	down
Petunidin-3-(6''-p-Coumaroylglucoside)	Flavonoids	1.06272	-2.89127	down
2'-Hydoxy,5-methoxy Genistein-O-rhamnosyl-glucoside	Flavonoids	1.06513	-2.95868	down
3-O-Caffeoylshikimic acid	Phenolic acids	1.06316	-3.07032	down
Isorhamnetin O-malonylglucoside	Flavonoids	1.06404	-3.11294	down
Thymidine	Nucleotides and derivatives	1.06487	-3.12615	down
2-Hydroxy-6-aminopurine	Nucleotides and derivatives	1.06491	-3.19434	down
L-(+)-Arginine	Amino acids and derivatives	1.06387	-3.21368	down
LysoPE 18:1	Lipids	1.06465	-3.24694	down
5-aminoimidazole ribonucleotide	Nucleotides and derivatives	1.06404	-3.26472	down
Dihydrokaempferol	Flavonoids	1.06171	-3.32325	down
L-Tyramine	Amino acids and derivatives	1.06236	-3.3959	down
Pipecolic acid	Amino acids and derivatives	1.06414	-3.44562	down
Luteolin	Flavonoids	1.0632	-3.52371	down
Esculetin	Lignans and Coumarins	1.06328	-3.59295	down
L-Tryptophan	Amino acids and derivatives	1.06521	-3.89695	down
Quercetin-3-O-(2''-acetyl)-β-D-glucuronide	Flavonoids	1.06511	-3.89946	down
H-HomoArg-OH	Amino acids and derivatives	1.06401	-4.03106	down
Indole	Alkaloids	1.05562	-4.0588	down
O-Acetylserine	Amino acids and derivatives	1.06502	-4.10888	down
Guanine	Nucleotides and derivatives	1.06501	-4.34283	down
9,10,13-Trihyroxy-11-octadecadienoic acid	Lipids	1.06467	-4.36392	down
Epigallocatechin	Flavonoids	1.06482	-4.40372	down
Phloretin	Flavonoids	1.06493	-4.63991	down
(R)-Pantetheine	Others	1.06089	-4.78839	down
Citraconic acid	Organic acids	1.0622	-5.23122	down
10-Formyl-THF	Alkaloids	1.06476	-5.33173	down
Eriodictyol	Flavonoids	1.06493	-5.56935	down
Acetyltryptophan	Amino acids and derivatives	1.06402	-5.67041	down
2-Methylsuccinic acid	Organic acids	1.06515	-6.3489	down
Isorhamnetin-O-glucopyranoside*	Flavonoids	1.05549	-6.48524	down
Trigonelline	Alkaloids	1.06463	-6.51746	down
2'-Hydroxyisoflavone	Flavonoids	1.06424	-6.54809	down
Kaempferide-malonylhexoside	Flavonoids	1.03991	-6.70992	down
Ligustilide	Others	1.0642	-7.236	down
4-Methyl-5-thiazoleethanol	Others	1.06513	-9.03461	down
Quillaic acid	Phenolic acids	1.06515	-13.7059	down
N-Acetyl-DL-tryptophan	Amino acids and derivatives	1.06515	-14.6778	down
Syringin	Phenolic acids	1.06523	-15.801	down
